# Supplementary material for: External electric field, a potential catalyst for C–N cross-coupling reaction
Source: Royal Society of Chemistry journal article supplement (doi:10.1039/d3cp04723g), 2023-01-01
Supplement: d3cp04723g1.pdf [file d3cp04723g1.pdf]

# **External electric field, a potential catalyst for C-N cross-coupling reaction.**

Priyanka Yadav and Pradeep Kumar\*

*Department of Chemistry, Malaviya National Institute of Technology Jaipur, Jaipur,  
302017, India*

E-mail: [pradeep.chy@mnit.ac.in](mailto:pradeep.chy@mnit.ac.in)

**S. No.****Contents**

1. **Figure S1:** Gibbs free energy ( $\text{kcal mol}^{-1}$ ) for the reaction of 2-chlorobenzoic acid and propylamine at 298 K, in the presence and absence of an EEF (a.u.) with different strengths.
2. A detailed discussion on the kinetics of the title reaction.
3. **Table S1:** Optimized geometries in Cartesian coordinates and normal mode frequencies of all species calculate at M06-2X/6-311++G\*\* level of theory

Figure S1: Gibbs free energy (kcal mol<sup>-1</sup>) for the reaction of 2-chlorobenzoic acid and propylamine at 298 K, in the presence and absence of an EEF (a.u.) with different strengths.

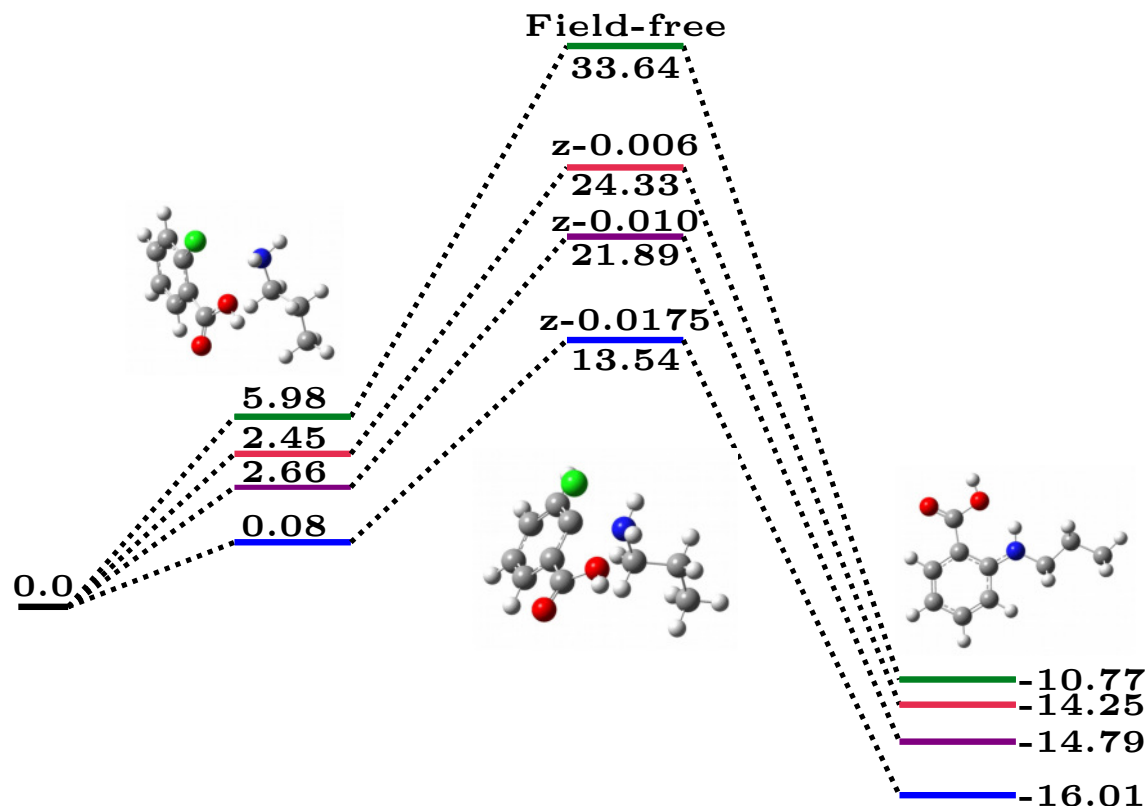

### 13. A detailed discussion on kinetics of the title reaction

Gibbs free energy profile often helps in selecting a method for the calculation of the rate of a reaction. Gibbs free energy (kcal mol<sup>-1</sup>) for the reaction of 2-chlorobenzoic acid and propylamine at 298 K, in the presence and absence of an EEF (a.u.) with different strengths is shown in figure S1. It can be clearly seen from figure S1 that the Gibbs free energy barrier for the formation of reactants from RC (bimolecular dissociation) is very low and the same for RC to product is very high i.e., rate of  $k_{-1} \gg \gg \gg k_{uni}$ . It suggests that the time scale associated with bimolecular dissociation is much lower than the same for the unimolecular transformation. It also suggests that these reactions can occur in two steps; first, equilibration process between reactants and RC followed by a slow unimolecular transformation. Therefore, we have applied pre-equilibrium approximation.

#### Pre-equilibrium approximation

The reaction mechanism for the reactions can be represented as:

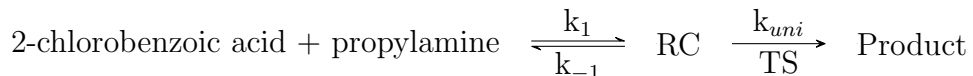

Here, above equation suggests that the reaction proceeds via two steps; first, a reactant-complex (RC) is formed with barrierless association process of the reactants and in second step, RC dissociates to form product through a corresponding transition state. In the first step,  $k_{eq}$  has been obtained using following formula:

$$k_{eq} = \sigma \frac{Q_{RC}}{Q_{ClC_7H_5O_2} Q_{NC_3H_9}} \exp\left[-\frac{(E_{RC} - E_R)}{RT}\right] \quad (1)$$

where  $\sigma$  is the symmetry number, variable Q denote the overall partition functions for the subscripted species 2-chlorobenzoic acid, propylamine and RC.  $E_{RC}$  and  $E_R$  represent energies of reactant-complex and isolated reactants respectively. All other information are given in main manuscript.

**Table S1: Optimized geometries in Cartesian coordinates and normal mode frequencies of all species calculate at M06-2X/6-311++G\*\* level of theory**

| compound             | Cartesian coordinates (Å) |           |           | frequency( $\text{cm}^{-1}$ ) |           |           |           |
|----------------------|---------------------------|-----------|-----------|-------------------------------|-----------|-----------|-----------|
| Propylamine          | C                         | -0.589713 | -0.506599 | -0.000062                     | 128.5853  | 227.8813  | 269.1544  |
|                      | H                         | -0.482909 | -1.155335 | 0.875213                      | 274.8809  | 451.3745  | 743.0273  |
|                      | H                         | -0.482880 | -1.155222 | -0.875416                     | 837.8747  | 859.6549  | 914.9056  |
|                      | C                         | 0.534428  | 0.530933  | 0.000022                      | 1032.626  | 1051.8929 | 1115.114  |
|                      | H                         | 0.423131  | 1.176240  | 0.878429                      | 1145.9829 | 1240.2369 | 1325.4831 |
|                      | H                         | 0.423183  | 1.176348  | -0.878312                     | 1326.0687 | 1387.528  | 1404.7411 |
|                      | C                         | 1.916709  | -0.117620 | 0.000016                      | 1413.1898 | 1487.612  | 1498.9785 |
|                      | H                         | 2.050490  | -0.748792 | 0.882417                      | 1506.0683 | 1512.5116 | 1664.8259 |
|                      | H                         | 2.050456  | -0.748866 | -0.882337                     | 3042.7748 | 3055.2866 | 3059.3558 |
|                      | H                         | 2.711799  | 0.629817  | -0.000032                     | 3073.0608 | 3100.0982 | 3126.9071 |
|                      | N                         | -1.950166 | 0.024287  | -0.000041                     | 3138.0404 | 3533.6815 | 3616.9544 |
|                      | H                         | -2.105180 | 0.608182  | -0.814957                     |           |           |           |
|                      | H                         | -2.105470 | 0.607335  | 0.815424                      |           |           |           |
| 2-chlorobenzoic acid | C                         | 2.150897  | -1.464878 | 0.072839                      | 37.0776   | 117.4089  | 205.094   |
|                      | C                         | 0.777854  | -1.638894 | 0.030046                      | 210.5656  | 299.0164  | 346.7358  |
|                      | C                         | 2.676183  | -0.176732 | 0.071477                      | 423.6018  | 464.2502  | 492.3379  |
|                      | H                         | 0.340901  | -2.629690 | 0.019544                      | 545.2568  | 589.0806  | 642.5285  |
|                      | H                         | 3.747894  | -0.021313 | 0.102388                      | 704.7096  | 718.0695  | 773.9525  |
|                      | C                         | -0.095189 | -0.546366 | 0.002145                      | 803.2117  | 822.5303  | 905.5595  |
|                      | C                         | 1.830017  | 0.921312  | 0.018413                      | 999.8686  | 1025.0865 | 1069.9436 |
|                      | H                         | 2.227195  | 1.927764  | -0.004258                     | 1076.3598 | 1155.6308 | 1167.5278 |
|                      | C                         | 0.449930  | 0.742267  | -0.014365                     | 1186.3    | 1232.9309 | 1292.1674 |
|                      | Cl                        | -0.517117 | 2.182072  | -0.140337                     | 1317.9457 | 1402.4115 | 1481.9338 |
|                      | H                         | 2.806312  | -2.325859 | 0.104206                      | 1521.3203 | 1641.1558 | 1670.3679 |
|                      | C                         | -1.549287 | -0.900180 | -0.013691                     | 1848.1569 | 3211.6582 | 3223.2439 |
|                      | O                         | -1.960449 | -1.958617 | -0.408359                     | 3232.2715 | 3237.1938 | 3830.7425 |
|                      | O                         | -2.354161 | 0.038478  | 0.498143                      |           |           |           |
|                      | H                         | -3.25686  | -0.304204 | 0.444392                      |           |           |           |
| RC                   | C                         | -2.085884 | 2.299789  | 0.329199                      | 15.6827   | 23.7315   | 34.0912   |
|                      | C                         | -1.136963 | 1.793431  | -0.541871                     | 40.0739   | 62.8699   | 105.0243  |
|                      | C                         | -2.861659 | 1.421573  | 1.078934                      | 116.1612  | 125.3309  | 190.8297  |
|                      | H                         | -0.522130 | 2.452649  | -1.142282                     | 208.9384  | 216.8357  | 239.3952  |
|                      | H                         | -3.608613 | 1.800052  | 1.766355                      | 275.7751  | 298.1711  | 317.1265  |
|                      | C                         | -0.930385 | 0.416106  | -0.673683                     | 348.2118  | 424.2071  | 455.7437  |
|                      | C                         | -2.690301 | 0.051851  | 0.946934                      | 463.3084  | 485.4559  | 544.4757  |
|                      | H                         | -3.296255 | -0.641356 | 1.515217                      | 595.8987  | 641.5903  | 701.0611  |
|                      | C                         | -1.727526 | -0.451179 | 0.079503                      | 713.8347  | 743.703   | 768.7542  |
|                      | Cl                        | -1.624139 | -2.184860 | -0.042012                     | 802.0333  | 817.2167  | 854.7126  |
|                      | C                         | 2.070788  | 0.320024  | 1.266931                      | 861.4499  | 899.6375  | 922.3299  |
|                      | H                         | 1.605330  | 0.896387  | 0.459181                      | 996.4092  | 1024.1389 | 1037.0081 |
|                      | H                         | 2.283092  | 1.042955  | 2.061352                      | 1052.1058 | 1065.8569 | 1076.2487 |
|                      | C                         | 3.383682  | -0.279193 | 0.760558                      | 1115.6462 | 1148.0917 | 1151.9313 |
|                      | H                         | 3.15254   | -1.047504 | 0.014428                      | 1165.289  | 1184.5951 | 1231.1252 |
|                      | H                         | 3.886058  | -0.792313 | 1.58797                       | 1240.2961 | 1291.6442 | 1319.6861 |
|                      | C                         | 4.30434   | 0.779246  | 0.158167                      | 1320.7639 | 1322.344  | 1384.4927 |
|                      | H                         | 3.82477   | 1.271428  | -0.692458                     | 1395.098  | 1402.1191 | 1413.7298 |
|                      | H                         | 4.545367  | 1.550583  | 0.894471                      | 1481.2524 | 1490.3691 | 1500.9146 |
|                      | H                         | 5.24359   | 0.346148  | -0.190339                     | 1505.7597 | 1513.6995 | 1520.8164 |

| compound | Cartesian coordinates (Å) |           |           | frequency(cm <sup>-1</sup> ) |           |           |           |
|----------|---------------------------|-----------|-----------|------------------------------|-----------|-----------|-----------|
|          | N                         | 1.086475  | -0.631572 | 1.77182                      | 1642.6843 | 1660.1626 | 1671.6546 |
|          | H                         | 1.448779  | -1.119025 | 2.584489                     | 1846.8326 | 3043.5486 | 3052.3147 |
|          | H                         | 0.8885    | -1.335658 | 1.066277                     | 3056.1457 | 3070.9633 | 3094.6966 |
|          | H                         | -2.219808 | 3.369852  | 0.42366                      | 3123.8501 | 3135.3447 | 3212.208  |
|          | C                         | 0.167566  | 0.034005  | -1.611959                    | 3222.9339 | 3233.4681 | 3239.2631 |
|          | O                         | 0.560503  | 0.747105  | -2.496186                    | 3529.3794 | 3611.6919 | 3822.9855 |
|          | O                         | 0.736681  | -1.155121 | -1.351698                    |           |           |           |
|          | H                         | 1.434392  | -1.280371 | -2.01006                     |           |           |           |
| TS       | C                         | -1.225158 | 2.294814  | -1.376384                    | -351.8317 | 41.27     | 53.6733   |
|          | C                         | -1.336597 | 0.947059  | -1.627413                    | 68.9531   | 84.4306   | 116.7188  |
|          | C                         | -0.870615 | 2.689927  | -0.072574                    | 152.2791  | 163.0214  | 198.9572  |
|          | H                         | -1.630872 | 0.582150  | -2.605192                    | 227.5915  | 237.8051  | 269.8517  |
|          | H                         | -0.814167 | 3.745043  | 0.174224                     | 304.8915  | 309.0103  | 366.1075  |
|          | C                         | -1.080652 | -0.029545 | -0.649593                    | 405.938   | 450.0037  | 454.2365  |
|          | C                         | -0.627785 | 1.778345  | 0.922266                     | 522.0929  | 539.0853  | 575.7164  |
|          | H                         | -0.425091 | 2.104963  | 1.935690                     | 628.7456  | 643.5728  | 715.1245  |
|          | C                         | -0.690552 | 0.364178  | 0.673306                     | 727.8389  | 747.4232  | 757.9571  |
|          | Cl                        | -1.498845 | -0.538655 | 2.096481                     | 782.258   | 817.1731  | 842.7191  |
|          | C                         | 1.919778  | 0.093895  | 0.011500                     | 891.5205  | 913.9627  | 963.181   |
|          | H                         | 1.593436  | -0.353715 | -0.930258                    | 997.2356  | 1002.5975 | 1048.6901 |
|          | H                         | 1.830239  | 1.179537  | -0.094288                    | 1053.8312 | 1064.3184 | 1095.9692 |
|          | C                         | 3.351076  | -0.313512 | 0.339746                     | 1101.4456 | 1119.5991 | 1123.654  |
|          | H                         | 3.39891   | -1.399394 | 0.468775                     | 1179.9797 | 1186.7298 | 1211.3355 |
|          | H                         | 3.647477  | 0.134216  | 1.294056                     | 1236.818  | 1276.3014 | 1324.1309 |
|          | C                         | 4.314429  | 0.124532  | -0.761122                    | 1327.3216 | 1340.9951 | 1381.8759 |
|          | H                         | 4.048039  | -0.333148 | -1.716473                    | 1389.6997 | 1415.3594 | 1420.5648 |
|          | H                         | 4.291034  | 1.208919  | -0.890981                    | 1448.9087 | 1493.5552 | 1497.364  |
|          | H                         | 5.339007  | -0.164067 | -0.523796                    | 1502.2539 | 1506.4432 | 1516.1296 |
|          | N                         | 0.948574  | -0.315089 | 1.033077                     | 1581.8319 | 1626.9534 | 1665.9838 |
|          | H                         | 1.190292  | 0.024719  | 1.962923                     | 1828.4883 | 3053.072  | 3066.0553 |
|          | H                         | 0.819033  | -1.326794 | 1.066811                     | 3075.3472 | 3089.8016 | 3128.8747 |
|          | H                         | -1.428615 | 3.027187  | -2.144811                    | 3138.7766 | 3147.6279 | 3192.5565 |
|          | C                         | -1.173166 | -1.423978 | -1.077581                    | 3210.9888 | 3213.2078 | 3244.3436 |
|          | O                         | -1.683169 | -1.831274 | -2.090997                    | 3477.2406 | 3572.7055 | 3842.1449 |
|          | O                         | -0.54208  | -2.298695 | -0.230513                    |           |           |           |
|          | H                         | -0.700926 | -3.1814   | -0.589228                    |           |           |           |
| PC       | C                         | -2.952130 | 1.922903  | 0.101559                     | 19.6877   | 37.3162   | 45.2878   |
|          | C                         | -2.933982 | 0.555564  | -0.103591                    | 58.5833   | 95.4333   | 96.182    |
|          | C                         | -1.742628 | 2.609039  | 0.140415                     | 116.1738  | 161.3108  | 186.723   |
|          | H                         | -3.853774 | -0.015027 | -0.134337                    | 232.7498  | 242.4643  | 280.8436  |
|          | H                         | -1.728376 | 3.679892  | 0.306259                     | 302.7414  | 315.4539  | 399.9684  |
|          | C                         | -1.736342 | -0.145649 | -0.278042                    | 428.3846  | 445.597   | 527.5395  |
|          | C                         | -0.541841 | 1.938105  | -0.027859                    | 562.2525  | 582.6316  | 602.636   |
|          | H                         | 0.383838  | 2.494335  | 0.018987                     | 647.9911  | 677.9175  | 723.2968  |
|          | C                         | -0.507891 | 0.553949  | -0.244069                    | 768.2394  | 777.5069  | 781.5799  |
|          | Cl                        | 1.544718  | -0.608537 | 2.506283                     | 814.9306  | 830.8096  | 869.9193  |
|          | C                         | 1.935367  | 0.670411  | -0.692871                    | 891.1487  | 898.2473  | 923.4745  |
|          | H                         | 1.741163  | 1.318889  | -1.556228                    | 933.908   | 998.735   | 1021.0699 |
|          | H                         | 2.208948  | 1.307242  | 0.154747                     | 1065.1161 | 1079.7376 | 1098.9036 |
|          | C                         | 3.083103  | -0.286047 | -0.985883                    | 1118.353  | 1141.4326 | 1170.0911 |
|          | H                         | 2.812461  | -0.924542 | -1.833958                    | 1182.7605 | 1191.2289 | 1227.6953 |
|          | H                         | 3.226452  | -0.938781 | -0.119489                    | 1278.6619 | 1284.6343 | 1307.5106 |
|          | C                         | 4.373449  | 0.467886  | -1.292984                    | 1330.1523 | 1338.3737 | 1345.5426 |

| compound                      | Cartesian coordinates (Å) |           |           | frequency( $\text{cm}^{-1}$ ) |           |           |           |
|-------------------------------|---------------------------|-----------|-----------|-------------------------------|-----------|-----------|-----------|
|                               | H                         | 4.250175  | 1.124484  | -2.157799                     | 1379.2762 | 1415.0951 | 1421.3769 |
|                               | H                         | 4.675026  | 1.082521  | -0.441806                     | 1484.2138 | 1497.36   | 1507.1173 |
|                               | H                         | 5.188212  | -0.223583 | -1.510637                     | 1509.7532 | 1510.858  | 1526.3374 |
|                               | N                         | 0.73499   | -0.09274  | -0.335764                     | 1557.24   | 1652.7338 | 1680.0146 |
|                               | H                         | 1.107622  | -0.479991 | 1.231911                      | 1850.659  | 1989.6609 | 3033.8677 |
|                               | H                         | 0.6824    | -0.989069 | -0.804682                     | 3051.8802 | 3063.9757 | 3081.1099 |
|                               | H                         | -3.890569 | 2.445363  | 0.232961                      | 3102.0994 | 3134.5939 | 3146.7364 |
|                               | C                         | -1.903133 | -1.609696 | -0.48356                      | 3210.0946 | 3226.1529 | 3238.0187 |
|                               | O                         | -2.949754 | -2.193449 | -0.415067                     | 3247.3023 | 3594.6519 | 3831.2333 |
|                               | O                         | -0.75801  | -2.273848 | -0.780822                     |           |           |           |
|                               | H                         | -0.990441 | -3.207844 | -0.873978                     |           |           |           |
| 2-chlorobenzoic acid (-0.006) | C                         | 0.000000  | 0.000000  | 0.000000                      | -2.7020   | 115.997   | 214.0671  |
|                               | Cl                        | 0.000000  | 0.000000  | 1.728747                      | 218.7673  | 302.2931  | 350.7335  |
|                               | C                         | 0.250927  | 0.000000  | -2.784386                     | 432.0412  | 470.9915  | 505.5561  |
|                               | C                         | -0.972365 | 0.245650  | -2.187668                     | 534.9753  | 612.326   | 642.7302  |
|                               | C                         | 1.361351  | -0.250521 | -1.982341                     | 708.0107  | 715.0047  | 765.699   |
|                               | H                         | -1.854880 | 0.447739  | -2.781387                     | 806.1022  | 822.1633  | 899.8233  |
|                               | H                         | 2.330951  | -0.445677 | -2.425364                     | 997.1159  | 1010.8883 | 1076.9122 |
|                               | C                         | -1.127888 | 0.247089  | -0.795919                     | 1078.8016 | 1156.0754 | 1167.7591 |
|                               | C                         | 1.235132  | -0.247015 | -0.603731                     | 1181.8471 | 1225.071  | 1287.1641 |
|                               | H                         | 2.090942  | -0.432513 | 0.032384                      | 1320.697  | 1410.8974 | 1480.2947 |
|                               | H                         | 0.340151  | 0.003416  | -3.863960                     | 1518.5824 | 1636.8366 | 1671.323  |
|                               | C                         | -2.526501 | 0.526819  | -0.327070                     | 1831.212  | 3201.8088 | 3216.959  |
|                               | O                         | -3.405595 | 0.858508  | -1.082769                     | 3230.6536 | 3234.0512 | 3822.1905 |
|                               | O                         | -2.7181   | 0.361621  | 0.97689                       |           |           |           |
|                               | H                         | -3.641581 | 0.570982  | 1.176699                      |           |           |           |
| Propylamine (-0.006)          | N                         | 0.0000    | 0.000000  | 0.000000                      | 129.7896  | 229.3665  | 271.8224  |
|                               | C                         | 0.0000    | 0.000000  | 2.536023                      | 291.8155  | 452.2606  | 747.1028  |
|                               | C                         | 0.798202  | 0.000000  | 1.232954                      | 864.4842  | 869.9635  | 945.2552  |
|                               | H                         | 1.454094  | -0.875703 | 1.206928                      | 1037.4796 | 1052.1049 | 1105.9675 |
|                               | H                         | 1.453997  | 0.875780  | 1.206903                      | 1148.385  | 1241.4372 | 1326.1855 |
|                               | H                         | -0.654889 | -0.878453 | 2.553747                      | 1326.3786 | 1389.6495 | 1403.116  |
|                               | H                         | -0.654455 | 0.878773  | 2.553945                      | 1419.9273 | 1488.2743 | 1499.7502 |
|                               | C                         | 0.904553  | -0.000344 | 3.765894                      | 1505.853  | 1513.0139 | 1663.2162 |
|                               | H                         | 1.548126  | -0.883394 | 3.778341                      | 3041.1719 | 3058.2374 | 3064.2859 |
|                               | H                         | 1.548523  | 0.882415  | 3.778527                      | 3072.6381 | 3102.8847 | 3131.2627 |
|                               | H                         | 0.324335  | -0.000307 | 4.688902                      | 3151.1958 | 3514.7424 | 3592.2543 |
|                               | H                         | -0.613535 | 0.809739  | 0.002864                      |           |           |           |
|                               | H                         | -0.613373 | -0.809863 | 0.002704                      |           |           |           |
| RC (-0.006)                   | C                         | 0.000000  | 0.000000  | 0.000000                      | 19.3811   | 24.1739   | 32.5378   |
|                               | N                         | 0.000000  | 0.000000  | 3.290688                      | 45.0794   | 56.2134   | 68.5358   |
|                               | C                         | 2.591700  | 0.000000  | 0.992954                      | 97.8324   | 132.3002  | 137.397   |
|                               | C                         | 1.924045  | -1.197455 | 0.789817                      | 179.6414  | 203.9943  | 231.2447  |
|                               | C                         | 1.958596  | 1.199680  | 0.688171                      | 273.3046  | 283.989   | 292.8539  |
|                               | H                         | 2.393626  | -2.144451 | 1.028591                      | 347.6449  | 404.3221  | 454.9134  |
|                               | H                         | 2.465414  | 2.141994  | 0.858706                      | 455.7295  | 473.6225  | 562.7287  |
|                               | C                         | 0.612563  | -1.210552 | 0.314899                      | 596.2791  | 639.4011  | 700.4756  |
|                               | C                         | 0.669832  | 1.202112  | 0.172549                      | 729.584   | 750.0002  | 768.4256  |
|                               | H                         | 0.167933  | 2.129101  | -0.072463                     | 799.7525  | 814.1473  | 866.2352  |
|                               | Cl                        | -1.610205 | 0.055563  | -0.675957                     | 867.4679  | 895.5089  | 940.5263  |
|                               | C                         | 0.581474  | -1.211512 | 3.875242                      | 985.1427  | 1019.3756 | 1038.2166 |
|                               | H                         | 0.342669  | -2.050648 | 3.210347                      | 1053.0983 | 1061.4757 | 1073.5622 |
|                               | H                         | 1.671852  | -1.103369 | 3.852686                      | 1111.5716 | 1148.296  | 1154.7714 |

| compound    | Cartesian coordinates (Å) |           |           | frequency( $\text{cm}^{-1}$ ) |           |           |           |
|-------------|---------------------------|-----------|-----------|-------------------------------|-----------|-----------|-----------|
|             | C                         | 0.133565  | -1.550809 | 5.295667                      | 1169.4386 | 1185.2176 | 1229.9302 |
|             | H                         | -0.956608 | -1.657890 | 5.309472                      | 1243.3536 | 1292.5982 | 1321.1335 |
|             | H                         | 0.372183  | -0.710307 | 5.955624                      | 1326.7313 | 1330.0786 | 1387.9157 |
|             | C                         | 0.791145  | -2.824884 | 5.819066                      | 1395.0703 | 1404.3215 | 1417.1464 |
|             | H                         | 0.545825  | -3.681717 | 5.185270                      | 1483.379  | 1487.5844 | 1497.4328 |
|             | H                         | 1.879224  | -2.723367 | 5.839446                      | 1506.9947 | 1511.8281 | 1524.2785 |
|             | H                         | 0.462424  | -3.055185 | 6.832789                      | 1647.2366 | 1659.298  | 1674.2911 |
|             | H                         | 0.208610  | 0.795618  | 3.887084                      | 1848.5714 | 3035.9956 | 3050.7925 |
|             | H                         | -1.012945 | -0.082747 | 3.282211                      | 3058.437  | 3068.8062 | 3094.1628 |
|             | H                         | 3.594355  | 0.000740  | 1.401928                      | 3125.0003 | 3149.1638 | 3209.3171 |
|             | C                         | -0.047070 | -2.546507 | 0.223916                      | 3218.635  | 3228.7222 | 3235.1754 |
|             | O                         | 0.480889  | -3.527374 | -0.230244                     | 3515.465  | 3592.9361 | 3829.6038 |
|             | O                         | -1.271923 | -2.563192 | 0.765188                      |           |           |           |
|             | H                         | -1.600008 | -3.471767 | 0.718796                      |           |           |           |
| TS (-0.006) | C                         | 0.000000  | 0.000000  | 0.000000                      | -335.3152 | 39.4367   | 52.3929   |
|             | N                         | 0.000000  | 0.000000  | 1.874757                      | 66.9057   | 83.6002   | 112.5679  |
|             | C                         | 2.454196  | 0.000000  | -1.474928                     | 147.648   | 163.3857  | 191.2558  |
|             | C                         | 1.803508  | -1.177594 | -1.179605                     | 221.6567  | 234.5257  | 255.8763  |
|             | C                         | 1.845852  | 1.202477  | -1.068129                     | 298.2715  | 319.8396  | 356.5791  |
|             | H                         | 2.212341  | -2.134879 | -1.483825                     | 408.0587  | 442.9641  | 448.9751  |
|             | H                         | 2.311150  | 2.152827  | -1.309286                     | 517.4533  | 542.7061  | 590.6543  |
|             | C                         | 0.594177  | -1.215023 | -0.468974                     | 630.5972  | 646.9236  | 683.7095  |
|             | C                         | 0.654124  | 1.217348  | -0.390602                     | 729.3775  | 740.8255  | 755.7905  |
|             | H                         | 0.175692  | 2.153975  | -0.129562                     | 785.7496  | 817.6948  | 844.2299  |
|             | Cl                        | -1.832210 | 0.134113  | -0.116706                     | 886.8904  | 913.9078  | 978.3159  |
|             | C                         | 1.348190  | -0.241924 | 2.405026                      | 988.4325  | 1000.262  | 1048.7647 |
|             | H                         | 1.642137  | -1.242233 | 2.076295                      | 1053.5996 | 1057.4083 | 1091.1431 |
|             | H                         | 2.016831  | 0.474829  | 1.917615                      | 1096.7657 | 1110.743  | 1132.2447 |
|             | C                         | 1.433016  | -0.125714 | 3.923516                      | 1171.6712 | 1181.5911 | 1211.6356 |
|             | H                         | 0.733931  | -0.832383 | 4.380961                      | 1236.2843 | 1275.3068 | 1326.9525 |
|             | H                         | 1.116334  | 0.876479  | 4.229548                      | 1330.1043 | 1340.7366 | 1384.5119 |
|             | C                         | 2.849738  | -0.397833 | 4.423090                      | 1391.089  | 1410.0645 | 1423.0903 |
|             | H                         | 3.172700  | -1.406176 | 4.154272                      | 1450.3615 | 1492.8792 | 1498.461  |
|             | H                         | 3.560071  | 0.312414  | 3.993314                      | 1501.2097 | 1507.595  | 1515.6656 |
|             | H                         | 2.902940  | -0.308959 | 5.507974                      | 1582.1777 | 1627.3881 | 1664.1881 |
|             | H                         | -0.369086 | 0.905826  | 2.161827                      | 1819.2578 | 3056.9698 | 3066.1086 |
|             | H                         | -0.657660 | -0.725715 | 2.159732                      | 3071.7181 | 3093.6695 | 3123.7661 |
|             | H                         | 3.397891  | 0.002341  | -2.002951                     | 3137.1071 | 3157.3037 | 3189.5808 |
|             | C                         | 0.044727  | -2.542821 | -0.176681                     | 3209.2152 | 3212.2023 | 3237.1379 |
|             | O                         | 0.312021  | -3.563624 | -0.764044                     | 3481.4224 | 3573.3678 | 3837.9299 |
|             | O                         | -0.787208 | -2.553481 | 0.898218                      |           |           |           |
|             | H                         | -1.088651 | -3.463938 | 1.017854                      |           |           |           |
| PC (-0.006) | C                         | 0.0000    | 0.0000    | 0.0000                        | 16.9244   | 38.3192   | 44.4642   |
|             | N                         | 0.0000    | 0.0000    | 1.376293                      | 59.7121   | 86.7737   | 96.2194   |
|             | C                         | 0.2096    | 0.0000    | -2.828553                     | 104.7915  | 145.4574  | 178.0109  |



| compound                      | Cartesian coordinates (Å) |           |           | frequency( $\text{cm}^{-1}$ ) |           |           |           |
|-------------------------------|---------------------------|-----------|-----------|-------------------------------|-----------|-----------|-----------|
|                               | C                         | -0.543848 | 0.955961  | -2.17603                      | 231.7833  | 240.5609  | 261.8479  |
|                               | C                         | 0.85782   | -0.969747 | -2.063178                     | 298.8873  | 314.7873  | 400.044   |
|                               | H                         | -1.066475 | 1.727906  | -2.727333                     | 430.2487  | 443.38    | 512.2654  |
|                               | H                         | 1.457308  | -1.734692 | -2.544272                     | 533.6316  | 570.9454  | 577.5703  |
|                               | C                         | -0.666205 | 0.980689  | -0.782638                     | 591.8825  | 630.9126  | 647.6735  |
|                               | C                         | 0.755187  | -0.974897 | -0.685995                     | 652.9459  | 722.486   | 764.7833  |
|                               | H                         | 1.275579  | -1.733738 | -0.119135                     | 773.2263  | 775.8589  | 812.6323  |
|                               | Cl                        | 2.766442  | 1.626269  | 1.267413                      | 868.1883  | 873.65    | 919.2574  |
|                               | C                         | 0.507176  | -1.119237 | 2.169527                      | 932.8623  | 989.6314  | 1000.0363 |
|                               | H                         | 0.013134  | -2.055048 | 1.877428                      | 1065.8482 | 1077.9662 | 1099.4759 |
|                               | H                         | 1.58039   | -1.233779 | 1.98004                       | 1117.8419 | 1145.0559 | 1169.4066 |
|                               | C                         | 0.288998  | -0.845043 | 3.651678                      | 1179.1447 | 1191.3047 | 1220.0894 |
|                               | H                         | -0.781327 | -0.709327 | 3.83939                       | 1280.2618 | 1288.0783 | 1310.4698 |
|                               | H                         | 0.784374  | 0.094722  | 3.915032                      | 1326.5512 | 1336.3571 | 1358.3083 |
|                               | C                         | 0.82776   | -1.979203 | 4.51815                       | 1390.858  | 1416.3956 | 1423.8229 |
|                               | H                         | 0.334937  | -2.924986 | 4.280868                      | 1487.247  | 1496.7866 | 1507.9639 |
|                               | H                         | 1.902412  | -2.107776 | 4.370802                      | 1509.299  | 1513.5162 | 1531.9226 |
|                               | H                         | 0.660896  | -1.773681 | 5.575217                      | 1563.072  | 1644.9301 | 1683.0195 |
|                               | H                         | 1.569754  | 1.151656  | 1.480987                      | 1833.5487 | 2610.706  | 3025.0632 |
|                               | H                         | -0.720851 | 0.551787  | 1.820591                      | 3054.9593 | 3067.3558 | 3070.5106 |
|                               | H                         | 0.293958  | 0.005222  | -3.907977                     | 3099.6969 | 3136.8043 | 3157.9911 |
|                               | C                         | -1.509257 | 2.086867  | -0.259333                     | 3198.0752 | 3215.175  | 3228.8886 |
|                               | O                         | -2.051892 | 2.913231  | -0.947486                     | 3248.6339 | 3626.6205 | 3825.9507 |
|                               | O                         | -1.636787 | 2.103333  | 1.08375                       |           |           |           |
|                               | H                         | -2.186437 | 2.862892  | 1.322927                      |           |           |           |
| 2-chlorobenzoic acid (-0.010) | C                         | 0.000000  | 0.000000  | 0.000000                      | 4.9417    | 114.762   | 214.1966  |
|                               | Cl                        | 0.000000  | 0.000000  | 1.722390                      | 219.3299  | 304.1634  | 351.4861  |
|                               | C                         | 0.266731  | 0.000000  | -2.787781                     | 430.9278  | 472.6278  | 507.6889  |
|                               | C                         | -0.984344 | -0.005551 | -2.198747                     | 533.5342  | 611.9364  | 641.7245  |
|                               | C                         | 1.399759  | 0.005922  | -1.976398                     | 703.9793  | 715.607   | 758.4278  |
|                               | H                         | -1.887125 | -0.009972 | -2.796589                     | 806.9661  | 818.6788  | 892.8019  |
|                               | H                         | 2.393308  | 0.010453  | -2.409972                     | 986.9363  | 999.8944  | 1075.5407 |
|                               | C                         | -1.147936 | -0.005785 | -0.807609                     | 1082.3245 | 1154.1533 | 1168.8804 |
|                               | C                         | 1.264536  | 0.005936  | -0.599957                     | 1180.31   | 1215.9622 | 1284.1762 |
|                               | H                         | 2.135057  | 0.010369  | 0.043502                      | 1321.9765 | 1415.0041 | 1479.8997 |
|                               | H                         | 0.361025  | -0.000158 | -3.867783                     | 1516.4943 | 1633.1554 | 1670.6019 |
|                               | C                         | -2.580160 | -0.012474 | -0.349885                     | 1821.6366 | 3191.0907 | 3209.6014 |
|                               | O                         | -3.502080 | -0.014193 | -1.130411                     | 3228.4514 | 3231.4271 | 3815.9394 |
|                               | O                         | -2.734406 | -0.016603 | 0.963385                      |           |           |           |
|                               | H                         | -3.679199 | -0.020741 | 1.175633                      |           |           |           |
| Propylamine (-0.010)          | N                         | 0.000000  | 0.000000  | 0.000000                      | 128.9411  | 230.0102  | 272.3814  |
|                               | C                         | 0.000000  | 0.000000  | 2.535457                      | 292.7058  | 452.3395  | 747.7151  |
|                               | C                         | 0.803310  | 0.000000  | 1.236339                      | 865.9037  | 877.6833  | 963.4987  |
|                               | H                         | 1.458156  | -0.876264 | 1.21004                       | 1038.0699 | 1050.9308 | 1098.0137 |
|                               | H                         | 1.458025  | 0.876358  | 1.209932                      | 1151.1402 | 1241.139  | 1325.0019 |
|                               | H                         | -0.655062 | -0.878592 | 2.550421                      | 1325.8333 | 1389.4022 | 1399.811  |
|                               | H                         | -0.654112 | 0.879293  | 2.550914                      | 1423.1198 | 1487.777  | 1499.5493 |
|                               | C                         | 0.898030  | -0.000794 | 3.770363                      | 1505.9102 | 1512.8186 | 1661.9705 |
|                               | H                         | 1.540352  | -0.884420 | 3.788371                      | 3039.7158 | 3059.7942 | 3067.0919 |
|                               | H                         | 1.541167  | 0.882232  | 3.788865                      | 3071.8998 | 3104.5427 | 3134.274  |
|                               | H                         | 0.312161  | -0.000767 | 4.689283                      | 3157.4987 | 3504.9035 | 3578.8836 |
|                               | H                         | -0.618471 | 0.806673  | 0.025978                      |           |           |           |
|                               | H                         | -0.618429 | -0.806706 | 0.025891                      |           |           |           |

| compound    | Cartesian coordinates (Å) |           |           | frequency(cm <sup>-1</sup> ) |           |           |           |
|-------------|---------------------------|-----------|-----------|------------------------------|-----------|-----------|-----------|
| RC (-0.010) | C                         | 0.000000  | 0.000000  | 0.000000                     | 12.7399   | 28.1896   | 30.0177   |
|             | N                         | 0.000000  | 0.000000  | 3.378961                     | 39.2105   | 54.656    | 56.7682   |
|             | C                         | 2.519220  | 0.000000  | 1.149505                     | 108.2121  | 128.0091  | 135.7037  |
|             | C                         | 1.890795  | -1.201635 | 0.855515                     | 161.162   | 197.286   | 232.3564  |
|             | C                         | 1.882334  | 1.201013  | 0.860793                     | 282.9453  | 290.2026  | 293.0281  |
|             | H                         | 2.363931  | -2.146296 | 1.097288                     | 349.7304  | 389.7884  | 450.8281  |
|             | H                         | 2.354058  | 2.141668  | 1.118334                     | 455.6339  | 464.8155  | 570.8095  |
|             | C                         | 0.615432  | -1.211165 | 0.294870                     | 592.8873  | 639.5181  | 699.1285  |
|             | C                         | 0.626380  | 1.206559  | 0.267276                     | 736.3644  | 745.0099  | 771.141   |
|             | H                         | 0.114342  | 2.134977  | 0.049762                     | 797.4505  | 810.2046  | 865.4662  |
|             | Cl                        | -1.577156 | 0.027132  | -0.763093                    | 879.5932  | 889.7686  | 964.864   |
|             | C                         | 0.722632  | -1.110879 | 4.014347                     | 979.6507  | 1019.6352 | 1038.6098 |
|             | H                         | 0.556334  | -2.007580 | 3.403652                     | 1053.2784 | 1058.0717 | 1071.2931 |
|             | H                         | 1.794885  | -0.891027 | 3.952970                     | 1106.1199 | 1151.4686 | 1157.8136 |
|             | C                         | 0.348143  | -1.406422 | 5.464640                     | 1170.9507 | 1185.7886 | 1230.1165 |
|             | H                         | -0.724204 | -1.623236 | 5.519593                     | 1241.1566 | 1291.5914 | 1319.2232 |
|             | H                         | 0.514289  | -0.507536 | 6.067037                     | 1323.8961 | 1327.6597 | 1387.2165 |
|             | C                         | 1.147179  | -2.570938 | 6.043014                     | 1397.363  | 1398.0386 | 1418.3383 |
|             | H                         | 0.975924  | -3.488080 | 5.471978                     | 1482.716  | 1485.723  | 1495.4921 |
|             | H                         | 2.218971  | -2.357390 | 6.027909                     | 1507.4408 | 1510.4362 | 1524.7089 |
|             | H                         | 0.867591  | -2.767248 | 7.077985                     | 1647.5554 | 1662.5177 | 1675.4646 |
|             | H                         | 0.143307  | 0.840292  | 3.933539                     | 1844.4469 | 3028.2734 | 3052.2306 |
|             | H                         | -0.997860 | -0.187278 | 3.435779                     | 3058.1221 | 3065.0145 | 3095.2501 |
|             | H                         | 3.488117  | 0.000005  | 1.633189                     | 3124.9141 | 3154.9785 | 3209.7837 |
|             | C                         | -0.045895 | -2.533347 | 0.075129                     | 3216.8519 | 3229.0679 | 3235.395  |
|             | O                         | 0.389666  | -3.405010 | -0.633140                    | 3510.5726 | 3583.2624 | 3828.3336 |
|             | O                         | -1.162600 | -2.659952 | 0.795006                     |           |           |           |
|             | H                         | -1.508606 | -3.554262 | 0.668526                     |           |           |           |
| TS (-0.010) | C                         | 0.000000  | 0.000000  | 0.000000                     | -309.5276 | 35.0721   | 50.6242   |
|             | N                         | 0.000000  | 0.000000  | 1.932444                     | 65.1728   | 83.7615   | 109.5994  |
|             | C                         | 2.499974  | 0.000000  | -1.386647                    | 143.4761  | 163.2368  | 185.5773  |
|             | C                         | 1.830979  | -1.177540 | -1.127803                    | 216.7118  | 230.4216  | 249.3214  |
|             | C                         | 1.884152  | 1.202628  | -0.992555                    | 295.8392  | 322.6757  | 351.3255  |
|             | H                         | 2.249199  | -2.134862 | -1.419154                    | 411.3036  | 436.9473  | 445.5818  |
|             | H                         | 2.368965  | 2.152217  | -1.195753                    | 512.0394  | 545.322   | 598.316   |
|             | C                         | 0.595228  | -1.211671 | -0.466750                    | 628.476   | 650.943   | 655.9734  |
|             | C                         | 0.664788  | 1.216616  | -0.364796                    | 729.2999  | 739.2654  | 753.0945  |
|             | H                         | 0.186874  | 2.152461  | -0.100562                    | 788.7549  | 818.151   | 846.3715  |
|             | Cl                        | -1.816514 | 0.132520  | -0.110333                    | 881.757   | 911.5107  | 980.222   |
|             | C                         | 1.341408  | -0.267376 | 2.469695                     | 993.1379  | 998.1661  | 1043.3803 |
|             | H                         | 1.626236  | -1.266979 | 2.128961                     | 1052.5026 | 1055.7984 | 1079.0029 |
|             | H                         | 2.024441  | 0.449137  | 2.001520                     | 1091.2617 | 1110.1826 | 1141.326  |
|             | C                         | 1.416703  | -0.176989 | 3.991837                     | 1164.7426 | 1180.9268 | 1211.7791 |
|             | H                         | 0.705319  | -0.882211 | 4.431996                     | 1234.7435 | 1274.4638 | 1328.3972 |
|             | H                         | 1.108520  | 0.823443  | 4.311477                     | 1330.185  | 1337.8573 | 1382.3104 |
|             | C                         | 2.824876  | -0.473787 | 4.500991                     | 1393.2276 | 1402.6419 | 1423.6251 |
|             | H                         | 3.139249  | -1.482204 | 4.221958                     | 1452.6971 | 1491.1553 | 1498.6336 |
|             | H                         | 3.548441  | 0.236379  | 4.093339                     | 1499.9722 | 1507.0776 | 1514.2805 |
|             | H                         | 2.865373  | -0.403077 | 5.587579                     | 1584.9434 | 1630.1729 | 1662.4975 |
|             | H                         | -0.350423 | 0.910882  | 2.227713                     | 1812.3273 | 3057.506  | 3063.9358 |
|             | H                         | -0.669792 | -0.709456 | 2.229150                     | 3069.0738 | 3094.5399 | 3118.3304 |
|             | H                         | 3.472566  | -0.000385 | -1.860327                    | 3136.1142 | 3160.1559 | 3187.9568 |
|             | C                         | 0.019865  | -2.540593 | -0.213496                    | 3206.5694 | 3213.6741 | 3230.3498 |

| compound                       | Cartesian coordinates (Å) |           |           | frequency( $\text{cm}^{-1}$ ) |           |           |           |
|--------------------------------|---------------------------|-----------|-----------|-------------------------------|-----------|-----------|-----------|
|                                | O                         | 0.256379  | -3.538880 | -0.854145                     | 3482.058  | 3571.8629 | 3833.8941 |
|                                | O                         | -0.786618 | -2.569873 | 0.870026                      |           |           |           |
|                                | H                         | -1.091881 | -3.479229 | 0.991485                      |           |           |           |
| PC (-0.010)                    | C                         | 0.000000  | 0.000000  | 0.000000                      | 24.39     | 34.112    | 46.0073   |
|                                | N                         | 0.000000  | 0.000000  | 1.360377                      | 61.792    | 79.9474   | 94.5304   |
|                                | C                         | 0.216550  | 0.000000  | -2.837216                     | 102.6095  | 140.6577  | 174.324   |
|                                | C                         | -0.687716 | 0.822097  | -2.194529                     | 230.6147  | 237.6843  | 255.8221  |
|                                | C                         | 1.011254  | -0.844830 | -2.055990                     | 296.3443  | 315.1607  | 392.7059  |
|                                | H                         | -1.329260 | 1.493161  | -2.752970                     | 401.9861  | 429.279   | 450.9661  |
|                                | H                         | 1.730629  | -1.508078 | -2.524932                     | 458.2678  | 545.837   | 565.0174  |
|                                | C                         | -0.820383 | 0.844638  | -0.802032                     | 590.2354  | 601.132   | 627.3322  |
|                                | C                         | 0.905123  | -0.852630 | -0.682603                     | 647.018   | 715.9833  | 749.3485  |
|                                | H                         | 1.537945  | -1.510917 | -0.104354                     | 769.5419  | 774.912   | 808.7947  |
|                                | Cl                        | 2.304486  | 2.346375  | 0.595721                      | 856.4862  | 869.4562  | 916.6392  |
|                                | C                         | 0.767921  | -0.929234 | 2.189654                      | 929.8324  | 978.7868  | 986.6515  |
|                                | H                         | 0.497776  | -1.965341 | 1.949604                      | 1063.9687 | 1072.7223 | 1095.2381 |
|                                | H                         | 1.836421  | -0.804740 | 1.977465                      | 1113.4965 | 1146.2095 | 1166.116  |
|                                | C                         | 0.508171  | -0.649125 | 3.664900                      | 1175.9189 | 1191.1218 | 1216.2199 |
|                                | H                         | -0.562053 | -0.758455 | 3.867968                      | 1277.1559 | 1285.8201 | 1313.7904 |
|                                | H                         | 0.772955  | 0.390444  | 3.883124                      | 1322.0167 | 1332.422  | 1365.6648 |
|                                | C                         | 1.304316  | -1.588159 | 4.566178                      | 1397.5479 | 1413.6691 | 1426.1289 |
|                                | H                         | 1.036757  | -2.631487 | 4.384070                      | 1486.4867 | 1495.7813 | 1507.5088 |
|                                | H                         | 2.378376  | -1.474934 | 4.402771                      | 1507.8809 | 1515.9963 | 1530.5616 |
|                                | H                         | 1.106896  | -1.375511 | 5.616298                      | 1565.7461 | 1638.806  | 1682.293  |
|                                | H                         | 1.418691  | 1.678211  | 1.260835                      | 1820.4162 | 2824.04   | 3025.6506 |
|                                | H                         | -0.749379 | 0.492823  | 1.825265                      | 3056.8548 | 3064.1341 | 3069.7565 |
|                                | H                         | 0.304002  | 0.010244  | -3.917213                     | 3100.2494 | 3138.99   | 3162.5691 |
|                                | C                         | -1.827687 | 1.809640  | -0.295174                     | 3185.36   | 3204.4298 | 3223.3388 |
|                                | O                         | -2.527999 | 2.495561  | -0.999735                     | 3249.0998 | 3632.5172 | 3817.6824 |
|                                | O                         | -1.905195 | 1.868823  | 1.046140                      |           |           |           |
|                                | H                         | -2.572727 | 2.525312  | 1.292246                      |           |           |           |
| 2-chlorobenzoic acid (-0.0175) | C                         | 0.000000  | 0.000000  | 0.000000                      | 28.5186   | 111.4215  | 210.7742  |
|                                | Cl                        | 0.000000  | 0.000000  | 1.711063                      | 220.8885  | 308.8017  | 352.3595  |
|                                | C                         | 0.288881  | 0.000000  | -2.796170                     | 423.02    | 474.1604  | 503.6486  |
|                                | C                         | -0.965524 | 0.001794  | -2.213519                     | 535.3387  | 625.1173  | 639.7071  |
|                                | C                         | 1.416964  | -0.001889 | -1.973597                     | 691.7148  | 716.6184  | 733.8833  |
|                                | H                         | -1.867825 | 0.003211  | -2.813208                     | 807.562   | 807.5974  | 868.9894  |
|                                | H                         | 2.416288  | -0.003303 | -2.395713                     | 947.5497  | 979.0503  | 1070.4941 |
|                                | C                         | -1.140019 | 0.001838  | -0.823343                     | 1084.9728 | 1149.7996 | 1166.2474 |
|                                | C                         | 1.270575  | -0.001956 | -0.600037                     | 1179.0735 | 1200.7913 | 1278.9739 |
|                                | H                         | 2.135802  | -0.003341 | 0.051447                      | 1325.4373 | 1421.9849 | 1478.7308 |
|                                | H                         | 0.391310  | 0.000402  | -3.877864                     | 1511.5104 | 1623.5566 | 1666.578  |
|                                | C                         | -2.579344 | 0.00338   | -0.375306                     | 1806.2805 | 3158.184  | 3195.5597 |
|                                | O                         | -3.490941 | 0.003482  | -1.174016                     | 3217.6771 | 3225.6207 | 3801.0508 |
|                                | O                         | -2.72839  | 0.00475   | 0.92848                       |           |           |           |
|                                | H                         | -3.665101 | 0.005845  | 1.17947                       |           |           |           |

| compound              | Cartesian coordinates (Å) |           |           | frequency(cm <sup>-1</sup> ) |             |             |           |
|-----------------------|---------------------------|-----------|-----------|------------------------------|-------------|-------------|-----------|
| Propylamine (-0.0175) | N                         | 0.000000  | 0.000000  | 0.000000                     | 128.354000  | 231.327100  | 273.3056  |
|                       | C                         | 0.000000  | 0.000000  | 2.536014                     | 308.389400  | 451.705500  | 748.4757  |
|                       | C                         | 0.812691  | 0.000000  | 1.243367                     | 867.646200  | 884.147100  | 989.0092  |
|                       | H                         | 1.465402  | -0.877543 | 1.216313                     | 1037.820400 | 1047.807400 | 1082.8225 |
|                       | H                         | 1.465045  | 0.877804  | 1.216045                     | 1158.227400 | 1239.267500 | 1321.1989 |
|                       | H                         | -0.655402 | -0.878979 | 2.545469                     | 1322.760000 | 1387.320800 | 1390.2928 |
|                       | H                         | -0.653090 | 0.880683  | 2.546777                     | 1426.955900 | 1485.598800 | 1498.0445 |
|                       | C                         | 0.885470  | -0.001968 | 3.781175                     | 1504.479200 | 1511.775700 | 1659.9555 |
|                       | H                         | 1.524995  | -0.886982 | 3.810223                     | 3035.437000 | 3061.543200 | 3068.9494 |
|                       | H                         | 1.526692  | 0.881776  | 3.811629                     | 3070.637900 | 3106.994800 | 3139.4513 |
|                       | H                         | 0.288253  | -0.002065 | 4.692524                     | 3163.008900 | 3490.262200 | 3557.9505 |
|                       | H                         | -0.624853 | 0.801444  | 0.064336                     |             |             |           |
|                       | H                         | -0.625040 | -0.801298 | 0.064341                     |             |             |           |
| RC (-0.0175)          | C                         | 0.000000  | 0.000000  | 0.000000                     | -9.0864     | 36.1378     | 44.4869   |
|                       | N                         | 0.000000  | 0.000000  | 3.297188                     | 58.6486     | 64.1296     | 72.2601   |
|                       | C                         | 2.411927  | 0.000000  | 1.372973                     | 125.8064    | 142.6562    | 154.9745  |
|                       | C                         | 1.799401  | -1.197215 | 1.036498                     | 178.1447    | 215.5727    | 231.2276  |
|                       | C                         | 1.792031  | 1.200117  | 1.049756                     | 295.246     | 296.4064    | 311.9752  |
|                       | H                         | 2.229527  | -2.138485 | 1.357375                     | 355.5399    | 391.6811    | 449.4471  |
|                       | H                         | 2.221184  | 2.138323  | 1.381573                     | 456.0533    | 459.7636    | 557.5061  |
|                       | C                         | 0.602313  | -1.215259 | 0.314524                     | 593.6757    | 636.7261    | 694.4394  |
|                       | C                         | 0.577981  | 1.203120  | 0.373271                     | 705.2342    | 748.8071    | 762.6715  |
|                       | H                         | 0.051082  | 2.129448  | 0.182664                     | 799.4391    | 814.1477    | 868.5027  |
|                       | Cl                        | -1.532459 | 0.066692  | -0.859741                    | 885.5419    | 888.3878    | 980.5617  |
|                       | C                         | 1.107873  | 0.102853  | 4.276792                     | 996.4659    | 1016.3111   | 1035.9912 |
|                       | H                         | 1.788446  | -0.739557 | 4.099909                     | 1052.3269   | 1053.7798   | 1076.1597 |
|                       | H                         | 1.674476  | 1.014776  | 4.047005                     | 1089.8705   | 1157.9658   | 1162.5957 |
|                       | C                         | 0.691729  | 0.118661  | 5.744891                     | 1175.4706   | 1189.68     | 1204.5457 |
|                       | H                         | 0.121269  | -0.790526 | 5.963443                     | 1240.4381   | 1293.5163   | 1321.7565 |
|                       | H                         | 0.012748  | 0.961408  | 5.915011                     | 1322.6296   | 1326.3754   | 1383.5958 |
|                       | C                         | 1.887481  | 0.218498  | 6.688996                     | 1389.4403   | 1397.7105   | 1424.0377 |
|                       | H                         | 2.561940  | -0.632597 | 6.565624                     | 1475.9203   | 1484.4981   | 1494.143  |
|                       | H                         | 2.454829  | 1.136588  | 6.515703                     | 1504.7716   | 1508.9833   | 1525.2215 |
|                       | H                         | 1.565107  | 0.227918  | 7.729992                     | 1641.577    | 1661.3549   | 1671.2969 |
|                       | H                         | -0.658308 | 0.744923  | 3.521113                     | 1806.056    | 3020.1491   | 3049.9088 |
|                       | H                         | -0.517777 | -0.846100 | 3.530757                     | 3055.166    | 3063.5626   | 3092.2815 |
|                       | H                         | 3.322872  | -0.005547 | 1.958584                     | 3131.1973   | 3160.5044   | 3211.2572 |
|                       | C                         | 0.017972  | -2.533799 | -0.06016                     | 3220.8946   | 3229.0879   | 3235.3962 |
| O                     | -0.455703                 | -2.822457 | -1.138343 | 3486.8001                    | 3548.8287   | 3847.3625   |           |
| O                     | 0.123216                  | -3.402097 | 0.942585  |                              |             |             |           |
| H                     | -0.282061                 | -4.242803 | 0.693419  |                              |             |             |           |
| TS (-0.0175)          | C                         | 0.000000  | 0.000000  | 0.000000                     | -233.468    | 22.6941     | 48.0146   |
|                       | N                         | 0.000000  | 0.000000  | 2.087835                     | 58.5236     | 81.7911     | 106.5849  |
|                       | C                         | 2.575054  | 0.000000  | -1.207323                    | 132.8937    | 160.6251    | 171.4699  |
|                       | C                         | 1.875878  | -1.177539 | -1.026480                    | 200.1807    | 216.2418    | 241.74    |
|                       | C                         | 1.951754  | 1.202435  | -0.826230                    | 291.1478    | 312.5304    | 349.3123  |
|                       | H                         | 2.311517  | -2.133505 | -1.296592                    | 418.1114    | 426.5145    | 437.0462  |
|                       | H                         | 2.474232  | 2.146735  | -0.941968                    | 496.4155    | 539.9741    | 573.8967  |
|                       | C                         | 0.596216  | -1.204461 | -0.458221                    | 606.0616    | 637.1442    | 661.7208  |
|                       | C                         | 0.68611   | 1.215042  | -0.293022                    | 724.9077    | 740.3549    | 748.3486  |
|                       | H                         | 0.210903  | 2.146572  | -0.010153                    | 794.5668    | 818.2551    | 852.7311  |
|                       | Cl                        | -1.789786 | 0.127172  | -0.074204                    | 874.5346    | 903.9657    | 969.0852  |
|                       | C                         | 1.326671  | -0.303221 | 2.649492                     | 995.584     | 1019.5901   | 1031.4666 |

|                      | Solvent (Toluene)         |           |           |                               |             |             |             |
|----------------------|---------------------------|-----------|-----------|-------------------------------|-------------|-------------|-------------|
| compound             | Cartesian coordinates (Å) |           |           | frequency( $\text{cm}^{-1}$ ) |             |             |             |
|                      | H                         | 1.612581  | -1.294898 | 2.282223                      | 1048.4379   | 1053.4201   | 1059.4764   |
|                      | H                         | 2.032869  | 0.423298  | 2.231761                      | 1078.1011   | 1116.5628   | 1153.0786   |
|                      | C                         | 1.366233  | -0.271386 | 4.178875                      | 1155.1213   | 1180.6287   | 1207.6407   |
|                      | H                         | 0.63625   | -0.985111 | 4.572718                      | 1232.5555   | 1273.394    | 1325.8811   |
|                      | H                         | 1.05646   | 0.718828  | 4.527209                      | 1328.6962   | 1331.3974   | 1376.3231   |
|                      | C                         | 2.755339  | -0.599725 | 4.719801                      | 1385.7457   | 1400.978200 | 1424.659200 |
|                      | H                         | 3.071442  | -1.601399 | 4.417962                      | 1458.3696   | 1486.226600 | 1494.610000 |
|                      | H                         | 3.497893  | 0.121768  | 4.369466                      | 1499.3934   | 1505.859900 | 1510.581600 |
|                      | H                         | 2.75739   | -0.570203 | 5.809399                      | 1590.973500 | 1635.854700 | 1657.162200 |
|                      | H                         | -0.324814 | 0.913238  | 2.406481                      | 1793.060600 | 3045.814900 | 3059.256100 |
|                      | H                         | -0.684932 | -0.68457  | 2.407745                      | 3066.821800 | 3086.509800 | 3108.715200 |
|                      | H                         | 3.593297  | -0.006841 | -1.575336                     | 3133.288700 | 3158.950000 | 3184.914000 |
|                      | C                         | -0.026693 | -2.533064 | -0.285123                     | 3201.132300 | 3216.149400 | 3222.276600 |
|                      | O                         | 0.14445   | -3.47258  | -1.034666                     | 3478.132900 | 3562.530400 | 3825.692600 |
|                      | O                         | -0.774761 | -2.612280 | 0.818123                      |             |             |             |
|                      | H                         | -1.092851 | -3.518876 | 0.933292                      |             |             |             |
| Propylamine          | C                         | -0.588819 | -0.509894 | -0.000083                     | 126.300900  | 226.5013    | 267.012     |
|                      | H                         | -0.481686 | -1.157382 | 0.875936                      | 269.227100  | 450.0175    | 743.0976    |
|                      | H                         | -0.481618 | -1.157215 | -0.876216                     | 851.860100  | 860.0187    | 921.5206    |
|                      | C                         | 0.532356  | 0.529891  | 0.000041                      | 1033.709400 | 1051.23     | 1110.8352   |
|                      | H                         | 0.419537  | 1.174176  | 0.878903                      | 1146.113500 | 1239.4742   | 1324.8581   |
|                      | H                         | 0.419595  | 1.174316  | -0.878730                     | 1326.134900 | 1387.1873   | 1403.7155   |
|                      | C                         | 1.915877  | -0.116150 | 0.000020                      | 1409.501800 | 1482.7964   | 1495.8914   |
|                      | H                         | 2.050718  | -0.746753 | 0.882703                      | 1500.95     | 1509.1137   | 1657.519    |
|                      | H                         | 2.050654  | -0.746824 | -0.882625                     | 3043.1373   | 3055.087    | 3058.2209   |
|                      | H                         | 2.708786  | 0.633688  | -0.000041                     | 3074.047    | 3100.4617   | 3125.5313   |
|                      | N                         | -1.950724 | 0.024623  | -0.000069                     | 3136.6759   | 3526.7045   | 3606.5624   |
|                      | H                         | -2.093480 | 0.615897  | -0.812867                     |             |             |             |
|                      | H                         | -2.093927 | 0.614654  | 0.813550                      |             |             |             |
| 2-chlorobenzoic acid | C                         | 2.156746  | -1.457885 | 0.082909                      | 36.3246     | 115.085100  | 201.664400  |
|                      | C                         | 0.783908  | -1.638157 | 0.03633                       | 208.239     | 298.681600  | 345.616000  |
|                      | C                         | 2.677509  | -0.167844 | 0.077668                      | 420.1718    | 461.293200  | 489.671     |
|                      | H                         | 0.354408  | -2.632232 | 0.030483                      | 548.084600  | 583.876900  | 640.2635    |
|                      | H                         | 3.748495  | -0.008696 | 0.110557                      | 701.747900  | 718.771300  | 772.9913    |
|                      | C                         | -0.091794 | -0.548316 | 0.002671                      | 802.071300  | 821.520300  | 905.4273    |
|                      | C                         | 1.827676  | 0.928086  | 0.017421                      | 999.202400  | 1027.686200 | 1066.132    |
|                      | H                         | 2.222871  | 1.935238  | -0.009908                     | 1074.825700 | 1153.955500 | 1165.774    |
|                      | C                         | 0.449473  | 0.741376  | -0.017015                     | 1184.939100 | 1228.135200 | 1291.2798   |
|                      | Cl                        | -0.530944 | 2.173787  | -0.156783                     | 1316.4602   | 1399.1009   | 1480.8527   |
|                      | H                         | 2.815338  | -2.316149 | 0.120197                      | 1520.4381   | 1640.2763   | 1668.1662   |
|                      | C                         | -1.546239 | -0.896883 | -0.015611                     | 1829.8532   | 3213.9816   | 3223.7707   |
|                      | O                         | -1.967028 | -1.9248   | -0.479848                     | 3232.7547   | 3237.9977   | 3817.4647   |
|                      | O                         | -2.334671 | 0.002983  | 0.578475                      |             |             |             |
|                      | H                         | -3.24514  | -0.320276 | 0.51873                       |             |             |             |
| TS                   | C                         | -1.148915 | 2.325252  | -1.360618                     | -366.8663   | 39.5416     | 57.1759     |
|                      | C                         | -1.282654 | 0.983358  | -1.630715                     | 68.7327     | 82.2536     | 113.2061    |
|                      | C                         | -0.826698 | 2.699541  | -0.041435                     | 149.8194    | 166.4749    | 194.5887    |
|                      | H                         | -1.551817 | 0.638968  | -2.622974                     | 224.6952    | 234.8909    | 262.1866    |
|                      | H                         | -0.753388 | 3.750441  | 0.218294                      | 301.4249    | 310.8842    | 358.7725    |
|                      | C                         | -1.082325 | -0.009569 | -0.654868                     | 405.9071    | 445.3056    | 451.7191    |
|                      | C                         | -0.636810 | 1.771146  | 0.949292                      | 519.0007    | 535.3121    | 570.6779    |
|                      | H                         | -0.447836 | 2.080945  | 1.970324                      | 627.8641    | 641.2207    | 700.4649    |
|                      | C                         | -0.713713 | 0.363641  | 0.678102                      | 726.5737    | 746.0109    | 755.5881    |

| compound                         | Cartesian coordinates (Å) |           |           | frequency(cm <sup>-1</sup> ) |            |           |           |
|----------------------------------|---------------------------|-----------|-----------|------------------------------|------------|-----------|-----------|
|                                  | Cl                        | -1.534831 | -0.552572 | 2.069773                     | 783.4349   | 817.0824  | 844.9312  |
|                                  | C                         | 1.929906  | 0.075911  | 0.039487                     | 888.2303   | 912.3384  | 962.9646  |
|                                  | H                         | 1.597298  | -0.346831 | -0.911857                    | 993.8052   | 1006.5459 | 1048.11   |
|                                  | H                         | 1.859288  | 1.164891  | -0.042739                    | 1053.907   | 1058.759  | 1090.8108 |
|                                  | C                         | 3.357639  | -0.358268 | 0.350671                     | 1100.9622  | 1111.7062 | 1124.0984 |
|                                  | H                         | 3.389513  | -1.447144 | 0.455216                     | 1172.8248  | 1182.5773 | 1207.4705 |
|                                  | H                         | 3.664784  | 0.064432  | 1.312468                     | 1235.2955  | 1273.8002 | 1323.3601 |
|                                  | C                         | 4.320263  | 0.090416  | -0.746426                    | 1329.0963  | 1340.4829 | 1384.1142 |
|                                  | H                         | 4.041045  | -0.341430 | -1.710211                    | 1390.4677  | 1413.2977 | 1415.7102 |
|                                  | H                         | 4.312589  | 1.177866  | -0.850854                    | 1448.6284  | 1488.2877 | 1494.5068 |
|                                  | H                         | 5.341521  | -0.219352 | -0.521546                    | 1498.8917  | 1500.6321 | 1513.3355 |
|                                  | N                         | 0.955858  | -0.340408 | 1.053952                     | 1580.6261  | 1625.9656 | 1662.6287 |
|                                  | H                         | 1.198000  | -0.008412 | 1.986631                     | 1797.7236  | 3055.8932 | 3064.2845 |
|                                  | H                         | 0.832570  | -1.352222 | 1.081715                     | 3074.1789  | 3092.2678 | 3126.1249 |
|                                  | H                         | -1.309314 | 3.070145  | -2.127554                    | 3136.6064  | 3146.552  | 3194.3935 |
|                                  | C                         | -1.191574 | -1.398264 | -1.099479                    | 3212.802   | 3214.9713 | 3241.3858 |
|                                  | O                         | -1.688418 | -1.777547 | -2.134568                    | 3484.1369  | 3577.5435 | 3831.0677 |
|                                  | O                         | -0.607372 | -2.290454 | -0.250869                    |            |           |           |
|                                  | H                         | -0.757513 | -3.170702 | -0.62129                     |            |           |           |
| Propylamine<br>(-0.006)          | N                         | -0.002348 | -0.000090 | -0.008007                    | 128.722100 | 226.9672  | 270.9938  |
|                                  | C                         | 0.008371  | -0.000033 | 2.523208                     | 283.579000 | 451.5381  | 746.6011  |
|                                  | C                         | 0.807446  | -0.000025 | 1.221284                     | 865.839    | 875.2831  | 956.5249  |
|                                  | H                         | 1.462259  | -0.876492 | 1.194499                     | 1038.1772  | 1052.9616 | 1100.2992 |
|                                  | H                         | 1.462184  | 0.876495  | 1.194463                     | 1150.5956  | 1240.5316 | 1326.7108 |
|                                  | H                         | -0.646180 | -0.878847 | 2.537399                     | 1326.9006  | 1387.9733 | 1401.8496 |
|                                  | H                         | -0.646227 | 0.878747  | 2.537385                     | 1416.2749  | 1482.6376 | 1496.4703 |
|                                  | C                         | 0.904999  | 0.000004  | 3.758330                     | 1499.9762  | 1509.7624 | 1655.1914 |
|                                  | H                         | 1.547711  | -0.883475 | 3.776436                     | 3040.4451  | 3058.0893 | 3064.0013 |
|                                  | H                         | 1.547699  | 0.883493  | 3.776396                     | 3072.456   | 3102.785  | 3131.2799 |
|                                  | H                         | 0.316253  | 0.000021  | 4.675902                     | 3151.0765  | 3510.0713 | 3584.2097 |
|                                  | H                         | -0.619313 | 0.807531  | 0.012271                     |            |           |           |
|                                  | H                         | -0.618898 | -0.808031 | 0.012099                     |            |           |           |
| 2-chlorobenzoic acid<br>(-0.006) | C                         | -0.025296 | -0.028712 | 0.003539                     | 30.858     | 115.4573  | 208.9585  |
|                                  | Cl                        | -0.043707 | -0.088932 | 1.731377                     | 216.1625   | 302.9929  | 348.4407  |
|                                  | C                         | 0.227311  | 0.022395  | -2.778896                    | 426.6751   | 468.1215  | 498.3796  |
|                                  | C                         | -0.783824 | 0.729166  | -2.15148                     | 542.6156   | 598.076   | 640.3713  |
|                                  | C                         | 1.119891  | -0.718784 | -2.008491                    | 705.3842   | 715.2288  | 762.3718  |
|                                  | H                         | -1.488084 | 1.321592  | -2.721889                    | 804.6401   | 820.9537  | 896.7173  |
|                                  | H                         | 1.921156  | -1.278158 | -2.476863                    | 991.1304   | 1010.5865 | 1074.4663 |
|                                  | C                         | -0.938554 | 0.711183  | -0.760734                    | 1076.89    | 1153.5077 | 1167.7928 |
|                                  | C                         | 0.997167  | -0.738476 | -0.628483                    | 1177.9946  | 1216.5563 | 1285.0164 |
|                                  | H                         | 1.693843  | -1.298165 | -0.017787                    | 1318.2931  | 1409.2503 | 1479.2213 |
|                                  | H                         | 0.321928  | 0.051047  | -3.857686                    | 1516.2692  | 1636.0176 | 1668.3928 |
|                                  | C                         | -2.093947 | 1.518756  | -0.24495                     | 1811.6907  | 3203.874  | 3218.5981 |
|                                  | O                         | -2.632641 | 2.368766  | -0.91246                     | 3231.3623  | 3235.9669 | 3808.0331 |
|                                  | O                         | -2.490375 | 1.189407  | 0.975656                     |            |           |           |
|                                  | H                         | -3.218346 | 1.770834  | 1.241666                     |            |           |           |
| TS (-0.006)                      | C                         | -0.040760 | -0.018136 | -0.040498                    | -330.9343  | 38.5399   | 55.8882   |
|                                  | N                         | -0.017547 | -0.056162 | 1.892426                     | 71.2887    | 82.8226   | 110.832   |
|                                  | C                         | 2.435187  | -0.008685 | -1.466716                    | 154.0835   | 166.1783  | 186.7002  |
|                                  | C                         | 1.774474  | -1.188824 | -1.200876                    | 220.2746   | 234.3533  | 253.1055  |
|                                  | C                         | 1.824487  | 1.191104  | -1.056549                    | 299.0025   | 321.6449  | 351.5558  |
|                                  | H                         | 2.192050  | -2.142304 | -1.504831                    | 410.8097   | 438.966   | 446.5599  |
|                                  | H                         | 2.300412  | 2.142147  | -1.272315                    | 513.9967   | 540.7327  | 587.7827  |

| compound                         | Cartesian coordinates (Å) |           |           | frequency( $\text{cm}^{-1}$ ) |           |           |           |
|----------------------------------|---------------------------|-----------|-----------|-------------------------------|-----------|-----------|-----------|
|                                  | C                         | 0.547649  | -1.228754 | -0.521505                     | 628.1687  | 647.5854  | 657.9581  |
|                                  | C                         | 0.617717  | 1.200687  | -0.402989                     | 727.1939  | 740.4257  | 755.548   |
|                                  | H                         | 0.143056  | 2.13509   | -0.128426                     | 788.325   | 818.4503  | 849.2238  |
|                                  | Cl                        | -1.861070 | 0.118268  | -0.125703                     | 883.3825  | 911.6031  | 980.754   |
|                                  | C                         | 1.348652  | -0.271242 | 2.384706                      | 987.9704  | 1003.7807 | 1046.0562 |
|                                  | H                         | 1.631936  | -1.292333 | 2.115491                      | 1054.2438 | 1056.2023 | 1073.5804 |
|                                  | H                         | 2.000035  | 0.41133   | 1.828239                      | 1096.7386 | 1110.0539 | 1138.175  |
|                                  | C                         | 1.499693  | -0.046783 | 3.886195                      | 1164.8204 | 1179.8506 | 1207.4141 |
|                                  | H                         | 0.829316  | -0.722467 | 4.424779                      | 1235.1887 | 1274.8059 | 1326.0292 |
|                                  | H                         | 1.18538   | 0.973241  | 4.12888                       | 1327.317  | 1342.7308 | 1382.8906 |
|                                  | C                         | 2.940679  | -0.267125 | 4.338839                      | 1392.9876 | 1406.5522 | 1418.2289 |
|                                  | H                         | 3.264486  | -1.289791 | 4.132236                      | 1452.0865 | 1487.4013 | 1496.5814 |
|                                  | H                         | 3.621124  | 0.416446  | 3.824842                      | 1497.6965 | 1502.2114 | 1512.6811 |
|                                  | H                         | 3.040582  | -0.095988 | 5.410502                      | 1582.8755 | 1632.0458 | 1659.566  |
|                                  | H                         | -0.393365 | 0.838641  | 2.205229                      | 1786.592  | 3057.6273 | 3063.242  |
|                                  | H                         | -0.653908 | -0.793492 | 2.192281                      | 3067.204  | 3096.9214 | 3119.6752 |
|                                  | H                         | 3.393302  | -0.004433 | -1.968721                     | 3134.6807 | 3156.5487 | 3192.2412 |
|                                  | C                         | -0.015859 | -2.559802 | -0.260372                     | 3208.9609 | 3216.1111 | 3234.0001 |
|                                  | O                         | 0.248761  | -3.564896 | -0.883579                     | 3485.9982 | 3577.3854 | 3825.1358 |
|                                  | O                         | -0.845421 | -2.590648 | 0.803163                      |           |           |           |
|                                  | H                         | -1.149007 | -3.501214 | 0.924093                      |           |           |           |
| 2-chlorobenzoic acid<br>(-0.010) | C                         | 0.285919  | 0.104423  | -2.768842                     | 42.3411   | 116.2489  | 207.62    |
|                                  | C                         | -0.781384 | 0.733736  | -2.151527                     | 216.2502  | 305.4914  | 349.4344  |
|                                  | C                         | 1.168887  | -0.650025 | -1.998087                     | 425.7148  | 469.0603  | 498.4277  |
|                                  | H                         | -1.488348 | 1.326002  | -2.719348                     | 546.7104  | 607.7442  | 639.1325  |
|                                  | H                         | 2.015929  | -1.148583 | -2.455272                     | 704.5401  | 717.1392  | 755.4464  |
|                                  | C                         | -0.992001 | 0.638194  | -0.771833                     | 805.0514  | 819.6876  | 890.7204  |
|                                  | C                         | 0.970349  | -0.772808 | -0.633055                     | 980.2176  | 999.1081  | 1073.0864 |
|                                  | H                         | 1.643766  | -1.363012 | -0.024624                     | 1080.7429 | 1153.0515 | 1171.1858 |
|                                  | H                         | 0.433086  | 0.20505   | -3.838368                     | 1176.9593 | 1207.8045 | 1283.6919 |
|                                  | C                         | -2.18289  | 1.399997  | -0.260172                     | 1319.6709 | 1414.9692 | 1479.5451 |
|                                  | O                         | -3.084434 | 1.738568  | -0.992908                     | 1515.0677 | 1632.1453 | 1668.325  |
|                                  | O                         | -2.120668 | 1.691258  | 1.023463                      | 1801.2377 | 3190.4386 | 3210.1268 |
|                                  | H                         | -2.919207 | 2.163733  | 1.305467                      | 3225.7199 | 3232.9115 | 3794.3682 |
| Propylamine<br>(-0.010)          | N                         | -0.00482  | -0.000104 | -0.01292                      | 129.4283  | 228.8163  | 272.3019  |
|                                  | C                         | 0.013743  | -3.6E-05  | 2.516919                      | 291.6848  | 451.8961  | 747.1015  |
|                                  | C                         | 0.815043  | -1.8E-05  | 1.2175                        | 867.8055  | 881.4374  | 975.3154  |
|                                  | H                         | 1.468285  | -0.877267 | 1.187048                      | 1038.5763 | 1051.8815 | 1091.9908 |
|                                  | H                         | 1.468198  | 0.877294  | 1.187008                      | 1154.7941 | 1240.0205 | 1325.8327 |
|                                  | H                         | -0.640964 | -0.879062 | 2.528736                      | 1327.1552 | 1387.0294 | 1398.1833 |
|                                  | H                         | -0.641019 | 0.87895   | 2.528725                      | 1419.6731 | 1481.8634 | 1496.1188 |
|                                  | C                         | 0.902809  | 0         | 3.757556                      | 1499.8651 | 1509.6193 | 1654.1961 |
|                                  | H                         | 1.544042  | -0.884085 | 3.783213                      | 3038.5294 | 3059.9182 | 3067.0595 |
|                                  | H                         | 1.544027  | 0.884098  | 3.783174                      | 3071.2272 | 3104.8405 | 3134.9538 |
|                                  | H                         | 0.305946  | 1.5E-05   | 4.66948                       | 3156.8252 | 3501.4187 | 3571.9859 |
|                                  | H                         | -0.625845 | 0.804465  | 0.032677                      |           |           |           |
|                                  | H                         | -0.625489 | -0.804954 | 0.032548                      |           |           |           |

| compound             | Cartesian coordinates (Å) |           |           | frequency(cm <sup>-1</sup> ) |           |           |           |
|----------------------|---------------------------|-----------|-----------|------------------------------|-----------|-----------|-----------|
| TS (-0.010)          | C                         | -0.063916 | -0.02867  | -0.086097                    | -287.7244 | 37.4258   | 57.3982   |
|                      | N                         | -0.021639 | -0.079076 | 1.925313                     | 73.1774   | 83.8518   | 110.9628  |
|                      | C                         | 2.44604   | -0.026805 | -1.436158                    | 154.6093  | 165.6928  | 180.3178  |
|                      | C                         | 1.764611  | -1.205339 | -1.207069                    | 213.6688  | 226.9266  | 245.2123  |
|                      | C                         | 1.838293  | 1.174097  | -1.027969                    | 295.7894  | 321.6621  | 350.7095  |
|                      | H                         | 2.187253  | -2.159488 | -1.502311                    | 415.7276  | 434.8967  | 442.0775  |
|                      | H                         | 2.338304  | 2.121557  | -1.200887                    | 507.288   | 543.0989  | 593.5069  |
|                      | C                         | 0.51734   | -1.2372   | -0.569628                    | 607.3615  | 637.1999  | 654.5725  |
|                      | C                         | 0.608519  | 1.186711  | -0.41561                     | 726.8322  | 740.4463  | 753.9504  |
|                      | H                         | 0.141001  | 2.1204    | -0.127219                    | 791.982   | 818.5252  | 852.8276  |
|                      | Cl                        | -1.8674   | 0.109087  | -0.139672                    | 881.6723  | 908.4643  | 979.0832  |
|                      | C                         | 1.351529  | -0.275903 | 2.407619                     | 998.9238  | 1005.358  | 1042.9796 |
|                      | H                         | 1.642798  | -1.299061 | 2.152822                     | 1053.3206 | 1056.3689 | 1060.1232 |
|                      | H                         | 1.993651  | 0.404836  | 1.836776                     | 1092.6205 | 1112.9518 | 1148.7253 |
|                      | C                         | 1.520098  | -0.02496  | 3.904556                     | 1159.3066 | 1179.9336 | 1206.0291 |
|                      | H                         | 0.868453  | -0.701716 | 4.463772                     | 1234.6202 | 1274.6172 | 1327.4385 |
|                      | H                         | 1.190864  | 0.993356  | 4.134399                     | 1329.4266 | 1340.569  | 1382.465  |
|                      | C                         | 2.969801  | -0.211768 | 4.343477                     | 1396.9607 | 1401.3215 | 1418.1377 |
|                      | H                         | 3.309552  | -1.233012 | 4.155944                     | 1455.5696 | 1485.9578 | 1495.6743 |
|                      | H                         | 3.632862  | 0.475219  | 3.810716                     | 1497.6536 | 1501.2999 | 1511.8295 |
|                      | H                         | 3.077098  | -0.018436 | 5.410444                     | 1586.7071 | 1635.2038 | 1656.6359 |
| H                    | -0.400749                 | 0.809752  | 2.251887  | 1776.9368                    | 3051.3373 | 3060.3765 |           |
| H                    | -0.644824                 | -0.818223 | 2.246836  | 3066.6746                    | 3097.0238 | 3114.4935 |           |
| H                    | 3.429252                  | -0.029303 | -1.888206 | 3133.2512                    | 3159.56   | 3191.349  |           |
| C                    | -0.076474                 | -2.567595 | -0.347624 | 3206.7124                    | 3218.3546 | 3228.0203 |           |
| O                    | 0.137924                  | -3.54223  | -1.039126 | 3486.0091                    | 3576.9912 | 3819.1692 |           |
| O                    | -0.857707                 | -2.622296 | 0.739461  |                              |           |           |           |
| H                    | -1.170494                 | -3.530059 | 0.862375  |                              |           |           |           |
|                      | Solvent (Ethanol)         |           |           |                              |           |           |           |
| 2-chlorobenzoic acid | C                         | 2.163552  | -1.449974 | 0.091666                     | 46.416    | 116.1585  | 197.3188  |
|                      | C                         | 0.790949  | -1.637367 | 0.042053                     | 205.3854  | 298.2694  | 346.1907  |
|                      | C                         | 2.679258  | -0.157767 | 0.082147                     | 416.7724  | 458.2838  | 487.2204  |
|                      | H                         | 0.368987  | -2.634713 | 0.043244                     | 552.3225  | 581.5877  | 638.8215  |
|                      | H                         | 3.749344  | 0.005584  | 0.116827                     | 698.8204  | 720.1985  | 771.9734  |
|                      | C                         | -0.087494 | -0.550334 | 0.00255                      | 801.0389  | 819.8635  | 905.837   |
|                      | C                         | 1.825346  | 0.935733  | 0.015493                     | 999.9536  | 1030.8721 | 1061.6843 |
|                      | H                         | 2.218139  | 1.943682  | -0.016051                    | 1073.3607 | 1152.4141 | 1164.189  |
|                      | C                         | 0.44909   | 0.740665  | -0.019829                    | 1183.2474 | 1225.2175 | 1291.5522 |
|                      | Cl                        | -0.547089 | 2.164172  | -0.170422                    | 1314.4987 | 1396.3494 | 1479.0545 |
|                      | H                         | 2.825714  | -2.305052 | 0.135168                     | 1519.3602 | 1639.0232 | 1665.7968 |
|                      | C                         | -1.54275  | -0.892998 | -0.017746                    | 1809.8833 | 3216.9898 | 3224.7066 |
|                      | O                         | -1.975252 | -1.881929 | -0.554735                    | 3233.7423 | 3239.308  | 3803.1071 |
|                      | O                         | -2.31219  | -0.040819 | 0.659842                     |           |           |           |
| H                    | -3.229839                 | -0.346195 | 0.599126  |                              |           |           |           |
| Propylamine          | C                         | -0.587659 | -0.513628 | -0.000084                    | 127.0109  | 227.5014  | 268.5939  |
|                      | H                         | -0.479973 | -1.159384 | 0.877070                     | 271.6368  | 449.2291  | 742.5985  |
|                      | H                         | -0.479852 | -1.159254 | -0.877323                    | 860.1096  | 864.9081  | 933.6051  |
|                      | C                         | 0.529940  | 0.528837  | 0.000054                     | 1035.9141 | 1050.4525 | 1106.398  |
|                      | H                         | 0.414889  | 1.171750  | 0.879420                     | 1147.7464 | 1238.887  | 1323.8901 |
|                      | H                         | 0.414936  | 1.171903  | -0.879212                    | 1326.4711 | 1387.1345 | 1403.1632 |
|                      | C                         | 1.914764  | -0.114478 | 0.000016                     | 1404.8372 | 1475.6886 | 1492.1663 |
|                      | H                         | 2.050677  | -0.744416 | 0.883088                     | 1494.8556 | 1505.1808 | 1649.6993 |
|                      | H                         | 2.050632  | -0.744374 | -0.883093                    | 3044.1316 | 3054.1257 | 3056.4575 |



| compound                         | Cartesian coordinates (Å) |           |           | frequency( $\text{cm}^{-1}$ ) |           |           |           |
|----------------------------------|---------------------------|-----------|-----------|-------------------------------|-----------|-----------|-----------|
|                                  | H                         | 2.705287  | 0.637980  | 0.000013                      | 3075.6001 | 3100.1893 | 3123.5196 |
|                                  | N                         | -1.950895 | 0.025125  | -0.000091                     | 3134.8678 | 3521.2922 | 3597.4779 |
|                                  | H                         | -2.081029 | 0.623465  | -0.810740                     |           |           |           |
|                                  | H                         | -2.081577 | 0.622061  | 0.811500                      |           |           |           |
| TS                               | C                         | -1.041475 | 2.353410  | -1.353877                     | -374.2197 | 38.1752   | 56.7971   |
|                                  | C                         | -1.209127 | 1.018417  | -1.639094                     | 67.6607   | 80.0929   | 109.5154  |
|                                  | C                         | -0.757894 | 2.710399  | -0.020088                     | 147.2925  | 167.1872  | 189.2015  |
|                                  | H                         | -1.445450 | 0.692155  | -2.645723                     | 220.9637  | 233.4462  | 252.4831  |
|                                  | H                         | -0.656250 | 3.756519  | 0.248707                      | 297.7131  | 314.5817  | 352.1754  |
|                                  | C                         | -1.084108 | 0.013520  | -0.661220                     | 406.7267  | 439.7117  | 449.1096  |
|                                  | C                         | -0.639480 | 1.769226  | 0.970070                      | 513.2789  | 527.8201  | 561.3599  |
|                                  | H                         | -0.465418 | 2.064882  | 1.997717                      | 626.3829  | 640.3259  | 676.5199  |
|                                  | C                         | -0.741763 | 0.368685  | 0.681542                      | 724.758   | 742.4193  | 753.6405  |
|                                  | Cl                        | -1.583846 | -0.549573 | 2.040944                      | 785.1043  | 816.3624  | 846.9426  |
|                                  | C                         | 1.931449  | 0.031138  | 0.063464                      | 882.4925  | 909.7534  | 965.1289  |
|                                  | H                         | 1.600502  | -0.402007 | -0.884110                     | 991.5536  | 1010.9789 | 1045.8349 |
|                                  | H                         | 1.868322  | 1.119972  | -0.029223                     | 1053.5933 | 1054.1023 | 1075.0344 |
|                                  | C                         | 3.359408  | -0.402107 | 0.376585                      | 1101.3337 | 1107.8587 | 1126.8487 |
|                                  | H                         | 3.388176  | -1.4897   | 0.491632                      | 1166.4838 | 1177.715  | 1202.3459 |
|                                  | H                         | 3.66597   | 0.030624  | 1.333613                      | 1234.7093 | 1270.1348 | 1321.856  |
|                                  | C                         | 4.320366  | 0.034634  | -0.72664                      | 1328.0251 | 1337.9508 | 1385.4489 |
|                                  | H                         | 4.039104  | -0.407618 | -1.685342                     | 1391.0647 | 1410.0208 | 1411.5726 |
|                                  | H                         | 4.312873  | 1.121208  | -0.841519                     | 1448.2122 | 1480.3961 | 1490.8027 |
|                                  | H                         | 5.34183   | -0.273512 | -0.499699                     | 1494.5454 | 1494.7402 | 1509.1281 |
|                                  | N                         | 0.957838  | -0.369983 | 1.082507                      | 1578.5119 | 1620.6907 | 1658.0883 |
|                                  | H                         | 1.205796  | -0.025318 | 2.009185                      | 1763.5993 | 3058.3304 | 3061.4436 |
|                                  | H                         | 0.841452  | -1.381371 | 1.126863                      | 3070.0855 | 3095.0403 | 3122.1668 |
|                                  | H                         | -1.141735 | 3.10742   | -2.122471                     | 3133.3717 | 3143.2747 | 3196.8064 |
|                                  | C                         | -1.215009 | -1.370052 | -1.119372                     | 3211.4157 | 3217.856  | 3236.6191 |
|                                  | O                         | -1.697973 | -1.720537 | -2.175735                     | 3488.3326 | 3580.901  | 3820.3237 |
|                                  | O                         | -0.683807 | -2.27802  | -0.267776                     |           |           |           |
|                                  | H                         | -0.814613 | -3.15581  | -0.653355                     |           |           |           |
| 2-chlorobenzoic acid<br>(-0.006) | C                         | -0.031421 | -0.030432 | 0.004454                      | 31.5795   | 114.9101  | 207.0533  |
|                                  | Cl                        | -0.052979 | -0.096028 | 1.732071                      | 214.2204  | 304.2312  | 347.3079  |
|                                  | C                         | 0.221858  | 0.024285  | -2.777953                     | 425.6986  | 466.7573  | 497.2586  |
|                                  | C                         | -0.733108 | 0.800446  | -2.143327                     | 546.6312  | 599.3384  | 638.5612  |
|                                  | C                         | 1.057081  | -0.788423 | -2.014422                     | 704.309   | 714.9675  | 760.5515  |
|                                  | H                         | -1.391115 | 1.446411  | -2.710967                     | 803.954   | 820.5113  | 899.2935  |
|                                  | H                         | 1.813744  | -1.402708 | -2.487894                     | 990.577   | 1014.5143 | 1071.2841 |
|                                  | C                         | -0.887235 | 0.782365  | -0.752509                     | 1075.7716 | 1150.63   | 1168.0707 |
|                                  | C                         | 0.934668  | -0.810104 | -0.633885                     | 1175.7687 | 1213.6882 | 1283.5531 |
|                                  | H                         | 1.589033  | -1.425318 | -0.029662                     | 1316.654  | 1408.7517 | 1477.9345 |
|                                  | H                         | 0.317420  | 0.054217  | -3.856670                     | 1514.5195 | 1633.0495 | 1666.0144 |
|                                  | C                         | -1.976755 | 1.668306  | -0.222657                     | 1786.1779 | 3204.6592 | 3218.7921 |
|                                  | O                         | -2.412972 | 2.598738  | -0.861640                     | 3229.3892 | 3233.8976 | 3788.1927 |
|                                  | O                         | -2.437285 | 1.31353   | 0.963364                      |           |           |           |
|                                  | H                         | -3.110177 | 1.946157  | 1.260069                      |           |           |           |
| Propylamine<br>(-0.006)          | N                         | -0.003439 | -0.000116 | -0.007953                     | 126.3406  | 226.0893  | 271.6115  |
|                                  | C                         | 0.008753  | -0.000029 | 2.520528                      | 278.926   | 450.3261  | 746.1863  |
|                                  | C                         | 0.811779  | -0.000010 | 1.221901                      | 865.5203  | 879.7791  | 969.5031  |
|                                  | H                         | 1.464973  | -0.877707 | 1.195924                      | 1039.0906 | 1051.8517 | 1094.861  |
|                                  | H                         | 1.464853  | 0.877774  | 1.195873                      | 1153.9065 | 1239.3259 | 1325.4868 |
|                                  | H                         | -0.644857 | -0.879341 | 2.532066                      | 1326.2403 | 1386.0903 | 1399.5211 |

| compound                         | Cartesian coordinates (Å) |           |           | frequency( $\text{cm}^{-1}$ ) |           |           |           |
|----------------------------------|---------------------------|-----------|-----------|-------------------------------|-----------|-----------|-----------|
|                                  | H                         | -0.644937 | 0.879225  | 2.532042                      | 1412.149  | 1475.3267 | 1492.3672 |
|                                  | C                         | 0.902086  | 0.000031  | 3.758021                      | 1493.5309 | 1506.1038 | 1646.3298 |
|                                  | H                         | 1.544053  | -0.883965 | 3.778299                      | 3041.8164 | 3056.3349 | 3062.7922 |
|                                  | H                         | 1.544003  | 0.884064  | 3.778257                      | 3074.3015 | 3101.8667 | 3129.9542 |
|                                  | H                         | 0.309230  | 0.000035  | 4.672896                      | 3150.8772 | 3504.4785 | 3574.7062 |
|                                  | H                         | -0.623775 | 0.805365  | 0.026173                      |           |           |           |
|                                  | H                         | -0.623255 | -0.806003 | 0.025978                      |           |           |           |
| TS (-0.006)                      | C                         | -0.040131 | -0.017647 | -0.062128                     | -317.0321 | 31.0971   | 47.7881   |
|                                  | N                         | -0.023068 | -0.053992 | 1.942629                      | 65.5514   | 79.6646   | 107.3503  |
|                                  | C                         | 2.489163  | -0.025008 | -1.374465                     | 148.7898  | 165.0706  | 178.5262  |
|                                  | C                         | 1.808271  | -1.201985 | -1.142777                     | 213.5548  | 225.2467  | 245.1279  |
|                                  | C                         | 1.872249  | 1.180051  | -0.989080                     | 295.2041  | 318.7725  | 349.9612  |
|                                  | H                         | 2.240983  | -2.156578 | -1.421310                     | 413.6627  | 434.5924  | 442.9219  |
|                                  | H                         | 2.370461  | 2.126528  | -1.170809                     | 506.7602  | 540.0747  | 582.2144  |
|                                  | C                         | 0.548364  | -1.230866 | -0.524783                     | 613.9895  | 637.2528  | 650.9116  |
|                                  | C                         | 0.634267  | 1.196504  | -0.393856                     | 724.8764  | 740.0633  | 752.5974  |
|                                  | H                         | 0.162106  | 2.132598  | -0.121283                     | 790.8446  | 817.4278  | 854.4912  |
|                                  | Cl                        | -1.845938 | 0.123989  | -0.143290                     | 878.9288  | 907.9856  | 982.7909  |
|                                  | C                         | 1.341102  | -0.298728 | 2.421669                      | 996.0804  | 1007.2764 | 1043.2626 |
|                                  | H                         | 1.599801  | -1.328089 | 2.156880                      | 1052.3491 | 1055.0225 | 1058.1658 |
|                                  | H                         | 2.004432  | 0.368489  | 1.859653                      | 1097.4927 | 1110.4525 | 1145.6538 |
|                                  | C                         | 1.517596  | -0.072539 | 3.92075                       | 1160.5507 | 1177.225  | 1202.1016 |
|                                  | H                         | 0.840538  | -0.73315  | 4.468749                      | 1234.7271 | 1271.8004 | 1323.7764 |
|                                  | H                         | 1.226695  | 0.954202  | 4.16264                       | 1328.1068 | 1338.8081 | 1383.7047 |
|                                  | C                         | 2.959631  | -0.320687 | 4.354512                      | 1396.1979 | 1403.6581 | 1411.8123 |
|                                  | H                         | 3.259291  | -1.35095  | 4.147856                      | 1453.0209 | 1478.9869 | 1492.0338 |
|                                  | H                         | 3.646617  | 0.348121  | 3.829126                      | 1493.9015 | 1496.2003 | 1508.1254 |
|                                  | H                         | 3.076893  | -0.147761 | 5.424204                      | 1584.1539 | 1628.7729 | 1653.8103 |
|                                  | H                         | -0.367891 | 0.853621  | 2.254389                      | 1751.7895 | 3051.9974 | 3058.895  |
|                                  | H                         | -0.672635 | -0.766654 | 2.27126                       | 3067.0107 | 3096.6235 | 3113.5524 |
|                                  | H                         | 3.474779  | -0.028766 | -1.820805                     | 3130.5147 | 3153.8168 | 3195.8898 |
|                                  | C                         | -0.039837 | -2.558687 | -0.285234                     | 3207.3016 | 3218.3147 | 3230.5046 |
|                                  | O                         | 0.21428   | -3.552829 | -0.938185                     | 3488.1175 | 3578.6759 | 3810.2353 |
|                                  | O                         | -0.866385 | -2.592199 | 0.766355                      |           |           |           |
|                                  | H                         | -1.173355 | -3.500294 | 0.90514                       |           |           |           |
| 2-chlorobenzoic acid<br>(-0.010) | C                         | -0.134330 | -0.147369 | -0.010496                     | 44.645    | 113.4604  | 204.0678  |
|                                  | Cl                        | -0.347912 | -0.430780 | 1.672557                      | 213.8129  | 306.246   | 348.9478  |
|                                  | C                         | 0.297251  | 0.114701  | -2.764822                     | 423.1814  | 467.6779  | 496.2636  |
|                                  | C                         | -0.726588 | 0.809812  | -2.142797                     | 551.1264  | 606.9154  | 636.9181  |
|                                  | C                         | 1.115972  | -0.717628 | -2.001776                     | 703.5278  | 717.31    | 750.7641  |
|                                  | H                         | -1.378538 | 1.466417  | -2.706056                     | 804.2358  | 819.2577  | 890.6608  |
|                                  | H                         | 1.929313  | -1.267445 | -2.461281                     | 975.1519  | 1001.8956 | 1069.1139 |
|                                  | C                         | -0.954946 | 0.703262  | -0.766678                     | 1079.799  | 1148.6636 | 1170.0842 |
|                                  | C                         | 0.897399  | -0.851338 | -0.640460                     | 1174.109  | 1200.6776 | 1281.0182 |
|                                  | H                         | 1.522030  | -1.499799 | -0.039115                     | 1318.4146 | 1416.6127 | 1477.4549 |
|                                  | H                         | 0.462783  | 0.226498  | -3.830751                     | 1512.914  | 1628.2282 | 1665.0258 |
|                                  | C                         | -2.089383 | 1.538786  | -0.241225                     | 1772.6674 | 3188.917  | 3210.9744 |
|                                  | O                         | -2.995123 | 1.900746  | -0.962865                     | 3222.0851 | 3230.036  | 3775.0078 |
|                                  | O                         | -1.966817 | 1.862299  | 1.024625                      |           |           |           |
|                                  | H                         | -2.730356 | 2.373281  | 1.339511                      |           |           |           |

| compound                | Cartesian coordinates (Å) |           |           | frequency(cm <sup>-1</sup> ) |           |           |           |
|-------------------------|---------------------------|-----------|-----------|------------------------------|-----------|-----------|-----------|
| Propylamine<br>(-0.010) | N                         | -0.006720 | -0.000129 | -0.012953                    | 128.318   | 228.8724  | 273.6368  |
|                         | C                         | 0.014524  | -3.6E-05  | 2.514036                     | 292.5639  | 451.4803  | 746.7441  |
|                         | C                         | 0.819844  | -8E-06    | 1.217885                     | 868.2113  | 884.7942  | 987.0399  |
|                         | H                         | 1.47128   | -0.878631 | 1.187814                     | 1039.4537 | 1051.4847 | 1086.5669 |
|                         | H                         | 1.471146  | 0.878712  | 1.187758                     | 1159.8982 | 1238.6285 | 1325.4618 |
|                         | H                         | -0.639182 | -0.879603 | 2.523159                     | 1326.1892 | 1384.865  | 1395.1685 |
|                         | H                         | -0.639281 | 0.879459  | 2.523136                     | 1415.8162 | 1474.3021 | 1491.7955 |
|                         | C                         | 0.899851  | 2.9E-05   | 3.757313                     | 1493.3977 | 1505.9708 | 1644.9858 |
|                         | H                         | 1.540111  | -0.884659 | 3.785721                     | 3040.0101 | 3057.9102 | 3066.1861 |
|                         | H                         | 1.540046  | 0.884764  | 3.785678                     | 3073.2792 | 3103.8274 | 3134.1126 |
|                         | H                         | 0.298271  | 2.8E-05   | 4.66607                      | 3157.0084 | 3497.0403 | 3563.5401 |
|                         | H                         | -0.630431 | 0.802263  | 0.047261                     |           |           |           |
| H                       | -0.629993                 | -0.80287  | 0.047126  |                              |           |           |           |
| TS (-0.010)             | C                         | -0.070678 | -0.030188 | -0.119187                    | -270.6497 | 23.8691   | 53.7577   |
|                         | N                         | -0.030329 | -0.095789 | 1.988441                     | 63.5183   | 74.7202   | 103.4347  |
|                         | C                         | 2.496424  | -0.051757 | -1.331381                    | 147.3866  | 160.2632  | 169.5613  |
|                         | C                         | 1.788034  | -1.224951 | -1.153236                    | 197.4195  | 210.0002  | 240.967   |
|                         | C                         | 1.888517  | 1.154836  | -0.941602                    | 292.1984  | 311.1768  | 349.619   |
|                         | H                         | 2.22208   | -2.181297 | -1.424553                    | 417.4779  | 426.6167  | 437.3431  |
|                         | H                         | 2.4178    | 2.094043  | -1.062908                    | 495.0842  | 527.7553  | 565.1251  |
|                         | C                         | 0.505848  | -1.240786 | -0.587652                    | 591.7075  | 633.2652  | 658.2048  |
|                         | C                         | 0.624729  | 1.17836   | -0.397721                    | 722.5414  | 740.724   | 750.7887  |
|                         | H                         | 0.163654  | 2.113193  | -0.102906                    | 793.9315  | 816.1723  | 857.7078  |
|                         | Cl                        | -1.858941 | 0.116545  | -0.155668                    | 876.7181  | 904.3371  | 975.6144  |
|                         | C                         | 1.348018  | -0.297392 | 2.44929                      | 1005.1657 | 1014.2171 | 1034.5427 |
|                         | H                         | 1.634961  | -1.321289 | 2.189244                     | 1040.2057 | 1054.5355 | 1057.3598 |
|                         | H                         | 1.98562   | 0.385818  | 1.874962                     | 1093.6419 | 1115.3314 | 1154.562  |
|                         | C                         | 1.547807  | -0.052271 | 3.943977                     | 1155.0992 | 1176.3933 | 1197.3685 |
|                         | H                         | 0.910604  | -0.734225 | 4.512574                     | 1234.2615 | 1271.5829 | 1323.4581 |
|                         | H                         | 1.219035  | 0.963431  | 4.184047                     | 1327.8721 | 1337.3185 | 1382.1216 |
|                         | C                         | 3.007144  | -0.235185 | 4.350432                     | 1396.9897 | 1402.9432 | 1411.5269 |
|                         | H                         | 3.346435  | -1.254765 | 4.151341                     | 1456.4568 | 1477.1825 | 1489.6657 |
|                         | H                         | 3.65564   | 0.458134  | 3.806902                     | 1494.6429 | 1495.6682 | 1506.7496 |
|                         | H                         | 3.136298  | -0.046327 | 5.41583                      | 1589.0647 | 1629.896  | 1649.5934 |
|                         | H                         | -0.394919 | 0.795285  | 2.325477                     | 1739.9808 | 3040.5623 | 3055.0096 |
|                         | H                         | -0.648222 | -0.825642 | 2.339597                     | 3069.1086 | 3089.6276 | 3110.4224 |
|                         | H                         | 3.508348  | -0.06618  | -1.715547                    | 3129.4795 | 3157.2395 | 3193.6988 |
|                         | C                         | -0.121632 | -2.565566 | -0.400839                    | 3203.4533 | 3219.8072 | 3226.1256 |
|                         | O                         | 0.062214  | -3.513392 | -1.145072                    | 3484.3488 | 3571.6946 | 3800.0616 |
|                         | O                         | -0.880794 | -2.636098 | 0.685796                     |           |           |           |
| H                       | -1.205413                 | -3.53985  | 0.818169  |                              |           |           |           |
|                         | Solvent (Water)           |           |           |                              |           |           |           |
| 2-chlorobenzoic acid    | C                         | 2.163938  | -1.449565 | 0.092269                     | 46.7075   | 116.13    | 197.0149  |
|                         | C                         | 0.791318  | -1.637374 | 0.042679                     | 205.1848  | 298.3016  | 346.2623  |
|                         | C                         | 2.679389  | -0.157233 | 0.082111                     | 416.5543  | 458.095   | 487.0756  |
|                         | H                         | 0.369875  | -2.634959 | 0.044772                     | 552.5247  | 581.493   | 638.6543  |
|                         | H                         | 3.74943   | 0.006354  | 0.116647                     | 698.5309  | 720.225   | 771.8155  |
|                         | C                         | -0.087297 | -0.550479 | 0.002673                     | 800.9298  | 819.6831  | 905.9135  |
|                         | C                         | 1.825236  | 0.936162  | 0.015081                     | 1000.1167 | 1031.1749 | 1061.2957 |
|                         | H                         | 2.217954  | 1.944135  | -0.016925                    | 1073.2373 | 1152.2648 | 1164.0049 |
|                         | C                         | 0.449097  | 0.740578  | -0.020008                    | 1183.1303 | 1224.9737 | 1291.6056 |
|                         | Cl                        | -0.547971 | 2.163686  | -0.170913                    | 1314.2798 | 1396.0823 | 1478.8471 |
|                         | H                         | 2.826294  | -2.304459 | 0.136329                     | 1519.2335 | 1638.8291 | 1665.537  |

| compound                         | Cartesian coordinates (Å) |           |           | frequency( $\text{cm}^{-1}$ ) |           |             |             |
|----------------------------------|---------------------------|-----------|-----------|-------------------------------|-----------|-------------|-------------|
|                                  | C                         | -1.542589 | -0.892723 | -0.017933                     | 1808.1147 | 3217.1876   | 3224.717    |
|                                  | O                         | -1.975735 | -1.879083 | -0.559405                     | 3233.7423 | 3239.3419   | 3801.8661   |
|                                  | O                         | -2.310955 | -0.043667 | 0.664362                      |           |             |             |
|                                  | H                         | -3.229078 | -0.34793  | 0.603806                      |           |             |             |
| Propylamine                      | C                         | -0.587530 | -0.513982 | -0.000085                     | 127.3859  | 227.7186    | 268.8988    |
|                                  | H                         | -0.479780 | -1.159550 | 0.877198                      | 272.4717  | 449.1626    | 742.5209    |
|                                  | H                         | -0.479651 | -1.159423 | -0.877450                     | 860.0671  | 865.9375    | 935.0322    |
|                                  | C                         | 0.529704  | 0.528756  | 0.000056                      | 1036.2028 | 1050.3602   | 1105.9858   |
|                                  | H                         | 0.414401  | 1.171517  | 0.879473                      | 1147.9696 | 1238.846    | 1323.7344   |
|                                  | H                         | 0.414446  | 1.171674  | -0.879257                     | 1326.4953 | 1387.151    | 1403.137    |
|                                  | C                         | 1.914642  | -0.114322 | 0.000016                      | 1404.3536 | 1474.9012   | 1491.7912   |
|                                  | H                         | 2.050632  | -0.744196 | 0.883130                      | 1494.2551 | 1504.7932   | 1648.981    |
|                                  | H                         | 2.050591  | -0.744137 | -0.883148                     | 3044.266  | 3053.9916   | 3056.2445   |
|                                  | H                         | 2.704960  | 0.638361  | 0.000022                      | 3075.7752 | 3100.1173   | 3123.2946   |
|                                  | N                         | -1.950889 | 0.025168  | -0.000095                     | 3134.6817 | 3520.8496   | 3596.6911   |
|                                  | H                         | -2.079852 | 0.624151  | -0.810539                     |           |             |             |
|                                  | H                         | -2.080417 | 0.622711  | 0.811316                      |           |             |             |
| TS                               | C                         | -1.032046 | 2.354253  | -1.355430                     | -374.5172 | 38.36       | 56.9588     |
|                                  | C                         | -1.201841 | 1.019594  | -1.641073                     | 67.9032   | 79.9303     | 109.5715    |
|                                  | C                         | -0.753136 | 2.711054  | -0.020526                     | 147.4972  | 167.4312    | 188.7997    |
|                                  | H                         | -1.433770 | 0.693891  | -2.648902                     | 220.8646  | 233.3667    | 252.0986    |
|                                  | H                         | -0.649283 | 3.756949  | 0.248233                      | 297.4907  | 314.9251    | 351.659     |
|                                  | C                         | -1.084031 | 0.014695  | -0.662138                     | 406.9979  | 439.2763    | 448.9783    |
|                                  | C                         | -0.641675 | 1.769747  | 0.970398                      | 512.6059  | 526.9887    | 560.5973    |
|                                  | H                         | -0.469585 | 2.065109  | 1.998452                      | 626.2073  | 640.4751    | 674.217     |
|                                  | C                         | -0.745560 | 0.369640  | 0.681421                      | 724.64    | 741.9418    | 753.5718    |
|                                  | Cl                        | -1.589423 | -0.548163 | 2.038111                      | 785.3256  | 816.2314    | 847.189     |
|                                  | C                         | 1.930746  | 0.026159  | 0.065432                      | 881.8959  | 909.4346    | 965.6212    |
|                                  | H                         | 1.601153  | -0.412824 | -0.879958                     | 991.1486  | 1011.4572   | 1045.917    |
|                                  | H                         | 1.866165  | 1.114469  | -0.032886                     | 1053.5742 | 1053.9682   | 1073.7102   |
|                                  | C                         | 3.35947   | -0.402707 | 0.381214                      | 1101.528  | 1107.7724   | 1127.1807   |
|                                  | H                         | 3.390001  | -1.489586 | 0.502115                      | 1166.097  | 1177.2752   | 1201.8684   |
|                                  | H                         | 3.664497  | 0.035901  | 1.336021                      | 1234.8772 | 1269.8316   | 1321.6825   |
|                                  | C                         | 4.319987  | 0.029907  | -0.723991                     | 1327.7039 | 1337.6635   | 1385.6243   |
|                                  | H                         | 4.039921  | -0.418183 | -1.680359                     | 1391.1899 | 1409.458    | 1411.3727   |
|                                  | H                         | 4.310394  | 1.115859  | -0.844646                     | 1448.2139 | 1479.5629   | 1490.4512   |
|                                  | H                         | 5.34198   | -0.275007 | -0.494971                     | 1494.0293 | 1494.3222   | 1508.7186   |
|                                  | N                         | 0.957867  | -0.371019 | 1.086459                      | 1578.3511 | 1620.5427   | 1657.6665   |
|                                  | H                         | 1.206552  | -0.021778 | 2.011233                      | 1760.3683 | 3058.4412   | 3061.0894   |
|                                  | H                         | 0.843173  | -1.382307 | 1.135757                      | 3069.5151 | 3095.2732   | 3121.7087   |
|                                  | H                         | -1.126298 | 3.108246  | -2.124839                     | 3133.0051 | 3142.7803   | 3197.1867   |
|                                  | C                         | -1.215182 | -1.368951 | -1.12055                      | 3211.3771 | 3218.1385   | 3236.4858   |
|                                  | O                         | -1.695724 | -1.718018 | -2.178922                     | 3488.9151 | 3581.4998   | 3819.4589   |
|                                  | O                         | -0.688627 | -2.277009 | -0.267638                     |           |             |             |
|                                  | H                         | -0.81536  | -3.154964 | -0.654413                     |           |             |             |
| 2-chlorobenzoic acid<br>(-0.006) | C                         | -0.031048 | -0.029714 | 0.00462                       | 31.4831   | 114.7324    | 206.603400  |
|                                  | Cl                        | -0.051825 | -0.093568 | 1.732303                      | 213.7874  | 304.250300  | 347.238300  |
|                                  | C                         | 0.220658  | 0.023903  | -2.777961                     | 425.2799  | 466.554300  | 497.011500  |
|                                  | C                         | -0.732512 | 0.802099  | -2.142957                     | 546.9452  | 596.928900  | 638.237200  |
|                                  | C                         | 1.054801  | -0.790236 | -2.014676                     | 704.0737  | 714.973600  | 760.272400  |
|                                  | H                         | -1.389698 | 1.448904  | -2.710633                     | 803.7678  | 820.366200  | 899.309100  |
|                                  | H                         | 1.810025  | -1.406070 | -2.488408                     | 990.4147  | 1014.812300 | 1071.042200 |

| compound                | Cartesian coordinates (Å) |           |           | frequency(cm <sup>-1</sup> ) |           |             |             |
|-------------------------|---------------------------|-----------|-----------|------------------------------|-----------|-------------|-------------|
|                         | C                         | -0.885749 | 0.784482  | -0.752057                    | 1075.687  | 1150.563900 | 1168.083000 |
|                         | C                         | 0.933242  | -0.811372 | -0.633987                    | 1175.5042 | 1212.761200 | 1283.587600 |
|                         | H                         | 1.586964  | -1.427620 | -0.030108                    | 1316.4677 | 1408.491    | 1477.7861   |
|                         | H                         | 0.315620  | 0.053309  | -3.856749                    | 1514.4149 | 1632.8292   | 1665.7861   |
|                         | C                         | -1.973010 | 1.672346  | -0.220941                    | 1784.0171 | 3204.7072   | 3218.7987   |
|                         | O                         | -2.401686 | 2.609245  | -0.855958                    | 3229.1593 | 3233.7989   | 3786.5393   |
|                         | O                         | -2.440484 | 1.311399  | 0.960095                     |           |             |             |
|                         | H                         | -3.110728 | 1.945453  | 1.260087                     |           |             |             |
| Propylamine<br>(-0.006) | N                         | -0.003551 | -0.000119 | -0.007946                    | 126.1162  | 225.9012    | 271.636300  |
|                         | C                         | 0.008805  | -0.000030 | 2.52025                      | 278.5665  | 450.140100  | 746.142600  |
|                         | C                         | 0.812196  | -0.000009 | 1.221941                     | 865.3788  | 880.102000  | 970.647500  |
|                         | H                         | 1.465224  | -0.877841 | 1.196027                     | 1039.1641 | 1051.714900 | 1094.346500 |
|                         | H                         | 1.465097  | 0.877916  | 1.195975                     | 1154.2413 | 1239.195700 | 1325.232100 |
|                         | H                         | -0.644709 | -0.879385 | 2.531512                     | 1326.0988 | 1385.843600 | 1399.210400 |
|                         | H                         | -0.644796 | 0.879262  | 2.531487                     | 1411.7467 | 1474.576500 | 1491.966100 |
|                         | C                         | 0.901846  | 0.000034  | 3.757951                     | 1492.9133 | 1505.767100 | 1645.422800 |
|                         | H                         | 1.543736  | -0.884016 | 3.778433                     | 3042.0314 | 3056.016400 | 3062.653400 |
|                         | H                         | 1.543678  | 0.884129  | 3.778389                     | 3074.518  | 3101.667500 | 3129.798000 |
|                         | H                         | 0.308609  | 0.000037  | 4.672577                     | 3150.8328 | 3503.997300 | 3573.862600 |
|                         | H                         | -0.624181 | 0.805162  | 0.027452                     |           |             |             |
|                         | H                         | -0.623641 | -0.805825 | 0.027251                     |           |             |             |
| TS (-0.006)             | C                         | -0.044309 | -0.018433 | -0.06104                     | -315.3444 | 30.4006     | 44.3474     |
|                         | N                         | -0.023366 | -0.057404 | 1.951512                     | 64.3377   | 78.6615     | 106.6404    |
|                         | C                         | 2.487603  | -0.019501 | -1.366514                    | 148.1381  | 164.9734    | 177.5221    |
|                         | C                         | 1.808274  | -1.198205 | -1.138331                    | 212.2717  | 223.6711    | 244.1868    |
|                         | C                         | 1.867788  | 1.184049  | -0.981009                    | 294.4213  | 317.9837    | 349.7472    |
|                         | H                         | 2.244362  | -2.15155  | -1.415935                    | 413.878   | 434.0204    | 442.5468    |
|                         | H                         | 2.365452  | 2.131514  | -1.158888                    | 505.6828  | 539.1237    | 580.4755    |
|                         | C                         | 0.546435  | -1.229855 | -0.524256                    | 609.9971  | 636.1424    | 651.2498    |
|                         | C                         | 0.627889  | 1.197368  | -0.389306                    | 724.54    | 739.8229    | 751.8897    |
|                         | H                         | 0.154170  | 2.132059  | -0.114688                    | 791.0207  | 817.2293    | 855.0161    |
|                         | Cl                        | -1.849209 | 0.118938  | -0.137231                    | 878.557   | 907.5855    | 982.2659    |
|                         | C                         | 1.342306  | -0.302894 | 2.42523                      | 996.8999  | 1007.9197   | 1043.245    |
|                         | H                         | 1.600657  | -1.331532 | 2.156967                     | 1050.9909 | 1054.8788   | 1057.1395   |
|                         | H                         | 2.003629  | 0.366399  | 1.863197                     | 1097.7948 | 1110.4097   | 1146.2851   |
|                         | C                         | 1.524515  | -0.081027 | 3.924337                     | 1159.9472 | 1177.0407   | 1201.4291   |
|                         | H                         | 0.850658  | -0.744458 | 4.472788                     | 1234.7178 | 1271.3139   | 1323.4026   |
|                         | H                         | 1.232955  | 0.944472  | 4.170463                     | 1328.2217 | 1338.0528   | 1383.8275   |
|                         | C                         | 2.968657  | -0.328287 | 4.351481                     | 1396.5316 | 1403.3678   | 1411.1185   |
|                         | H                         | 3.269048  | -1.357476 | 4.140364                     | 1453.1185 | 1477.8909   | 1491.4057   |
|                         | H                         | 3.652441  | 0.343406  | 3.825502                     | 1493.4923 | 1495.6556   | 1507.4334   |
|                         | H                         | 3.089932  | -0.158577 | 5.421255                     | 1584.2434 | 1628.2857   | 1653.1527   |
|                         | H                         | -0.366342 | 0.850141  | 2.265482                     | 1748.401  | 3051.0312   | 3058.2632   |
|                         | H                         | -0.671740 | -0.769593 | 2.283429                     | 3067.0703 | 3096.2085   | 3112.8613   |
|                         | H                         | 3.475040  | -0.021024 | -1.808899                    | 3129.9742 | 3153.3411   | 3196.237    |
|                         | C                         | -0.040038 | -2.559262 | -0.286956                    | 3206.906  | 3218.3927   | 3230.1785   |
|                         | O                         | 0.214018  | -3.550634 | -0.944898                    | 3488.2381 | 3578.693    | 3808.701    |
|                         | O                         | -0.863325 | -2.596604 | 0.765624                     |           |             |             |
|                         | H                         | -1.167383 | -3.505525 | 0.906219                     |           |             |             |

| compound                         | Cartesian coordinates (Å) |            |            | frequency( $\text{cm}^{-1}$ ) |            |             |             |
|----------------------------------|---------------------------|------------|------------|-------------------------------|------------|-------------|-------------|
| 2-chlorobenzoic acid<br>(-0.010) | C                         | -0.136353  | -0.148926  | -0.010744                     | 45.6778    | 113.598300  | 203.761300  |
|                                  | Cl                        | -0.352420  | -0.433712  | 1.671591                      | 213.621    | 306.344400  | 348.928400  |
|                                  | C                         | 0.297601   | 0.115646   | -2.764567                     | 422.8766   | 467.576200  | 496.187700  |
|                                  | C                         | -0.725391  | 0.812091   | -2.142358                     | 551.6399   | 606.641700  | 636.774200  |
|                                  | C                         | 1.114306   | -0.719048  | -2.001864                     | 703.5262   | 717.420100  | 750.156300  |
|                                  | H                         | -1.375151  | 1.471049   | -2.705446                     | 804.1468   | 819.181700  | 890.385500  |
|                                  | H                         | 1.927097   | -1.26973   | -2.461293                     | 974.4055   | 1002.031400 | 1068.816200 |
|                                  | C                         | -0.954801  | 0.704214   | -0.766574                     | 1079.7476  | 1148.426600 | 1169.897200 |
|                                  | C                         | 0.894574   | -0.853986  | -0.640774                     | 1174.1116  | 1200.196300 | 1280.951300 |
|                                  | H                         | 1.517852   | -1.504148  | -0.039841                     | 1318.2502  | 1416.8459   | 1477.3351   |
|                                  | H                         | 0.464259   | 0.22861    | -3.830215                     | 1512.7018  | 1627.8747   | 1664.683    |
|                                  | C                         | -2.087707  | 1.541124   | -0.239996                     | 1769.9416  | 3188.7424   | 3210.9713   |
|                                  | O                         | -2.996469  | 1.899485   | -0.960167                     | 3221.683   | 3229.9707   | 3773.0223   |
|                                  | O                         | -1.959986  | 1.869765   | 1.023483                      |            |             |             |
| H                                | -2.722842                 | 2.380126   | 1.341434   |                               |            |             |             |
| Propylamine<br>(-0.010)          | N                         | -0.0069130 | -0.0001330 | -0.0129500                    | 128.0596   | 228.807900  | 273.632300  |
|                                  | C                         | 0.0146180  | -0.0000370 | 2.5137450                     | 293.0844   | 451.378200  | 746.717400  |
|                                  | C                         | 0.8203050  | -0.0000070 | 1.2179020                     | 868.123    | 885.041600  | 987.953200  |
|                                  | H                         | 1.4715610  | -0.8787780 | 1.1878500                     | 1039.5058  | 1051.483400 | 1086.070800 |
|                                  | H                         | 1.4714190  | 0.8788680  | 1.1877920                     | 1160.3968  | 1238.482400 | 1325.318500 |
|                                  | H                         | -0.6389890 | -0.8796470 | 2.5225840                     | 1325.9553  | 1384.588400 | 1394.782500 |
|                                  | H                         | -0.6390950 | 0.8794950  | 2.5225600                     | 1415.4575  | 1473.530900 | 1491.384300 |
|                                  | C                         | 0.8996060  | 0.0000330  | 3.7572570                     | 1492.8014  | 1505.641200 | 1643.998200 |
|                                  | H                         | 1.5397680  | -0.8847170 | 3.7859210                     | 3040.2297  | 3057.540000 | 3066.084400 |
|                                  | H                         | 1.5396940  | 0.8848380  | 3.7858780                     | 3073.514   | 3103.587400 | 3134.002800 |
|                                  | H                         | 0.2975900  | 0.0000290  | 4.6657180                     | 3157.008   | 3496.637200 | 3562.764100 |
|                                  | H                         | -0.6308510 | 0.8020620  | 0.0485900                     |            |             |             |
|                                  | H                         | -0.6303980 | -0.8026900 | 0.0484520                     |            |             |             |
|                                  | TS (-0.010)               | C          | -0.0700710 | -0.0306400                    | -0.1218930 | -269.5457   | 21.4975     |
| N                                |                           | -0.0292100 | -0.1014030 | 1.9963300                     | 61.3209    | 73.5907     | 102.6099    |
| C                                |                           | 2.5019890  | -0.0619730 | -1.3204040                    | 145.3906   | 159.0128    | 168.7692    |
| C                                |                           | 1.7868700  | -1.2323930 | -1.1494010                    | 195.1666   | 208.3706    | 241.114     |
| C                                |                           | 1.8983750  | 1.1467360  | -0.9308000                    | 291.3445   | 309.5458    | 349.4038    |
| H                                |                           | 2.2186650  | -2.1901140 | -1.4195660                    | 417.1396   | 425.5744    | 436.4441    |
| H                                |                           | 2.4336840  | 2.0833180  | -1.0454910                    | 493.8665   | 524.3604    | 563.0546    |
| C                                |                           | 0.5013970  | -1.2427010 | -0.5911240                    | 591.261    | 632.8973    | 658.4567    |
| C                                |                           | 0.6315970  | 1.1751370  | -0.3933950                    | 721.5512   | 740.5834    | 750.2297    |
| H                                |                           | 0.1746040  | 2.1112660  | -0.0963250                    | 793.9456   | 815.9625    | 857.9873    |
| Cl                               |                           | -1.8565070 | 0.1226420  | -0.1547440                    | 876.4386   | 904.0171    | 973.5432    |
| C                                |                           | 1.3506880  | -0.2961850 | 2.4551730                     | 1005.7056  | 1014.818    | 1033.4587   |
| H                                |                           | 1.6442460  | -1.3171430 | 2.1905970                     | 1040.1471  | 1054.5116   | 1057.083    |
| H                                |                           | 1.983542   | 0.393935   | 1.8838                        | 1093.7388  | 1115.4282   | 1154.2593   |
| C                                |                           | 1.551355   | -0.056277  | 3.950638                      | 1155.5562  | 1175.6829   | 1196.2824   |
| H                                |                           | 0.920574   | -0.745745  | 4.517241                      | 1234.3038  | 1270.9302   | 1322.9091   |
| H                                |                           | 1.215175   | 0.955738   | 4.195767                      | 1327.7503  | 1337.2613   | 1382.314    |
| C                                |                           | 3.012892   | -0.229553  | 4.353346                      | 1396.7356  | 1403.4778   | 1410.8331   |
| H                                |                           | 3.359753   | -1.245612  | 4.149066                      | 1456.3111  | 1476.143    | 1488.9989   |
| H                                |                           | 3.654766   | 0.471394   | 3.811619                      | 1494.2576  | 1495.1681   | 1506.0306   |
| H                                |                           | 3.142773   | -0.044381  | 5.419312                      | 1589.2974  | 1630.0221   | 1648.8331   |
| H                                |                           | -0.398022  | 0.786582   | 2.33691                       | 1736.2595  | 3039.5638   | 3054.2667   |
| H                                |                           | -0.642228  | -0.835041  | 2.348143                      | 3069.3218  | 3088.493    | 3109.9552   |
| H                                |                           | 3.516513   | -0.080674  | -1.697542                     | 3129.0945  | 3156.885    | 3193.8483   |
| C                                |                           | -0.134867  | -2.564820  | -0.411219                     | 3202.8795  | 3220.0142   | 3226.1303   |

| compound | Cartesian coordinates (Å)      | frequency( $\text{cm}^{-1}$ ) |
|----------|--------------------------------|-------------------------------|
|          | O 0.039395 -3.507458 -1.165144 | 3484.5308 3571.1599 3798.1097 |
|          | O -0.889001 -2.637928 0.677194 |                               |
|          | H -1.21883 -3.540201 0.80781   |                               |
